# Supplementary material for: Gold-catalyzed intramolecular hydroamination of terminal alkynes in aqueous media: efficient and regioselective synthesis of indole-1-carboxamides
Source: Royal Society of Chemistry journal article supplement (doi:10.1039/b904044g), 2009-01-01

## Supporting Information

### Gold-catalyzed intramolecular hydroamination of terminal alkynes in aqueous media: efficient and regioselective synthesis of indole-1-carboxamides

Deju Ye,<sup>a</sup> Jinfang Wang,<sup>a</sup> Xu Zhang,<sup>a,b</sup> Yu Zhou,<sup>a</sup> Xiao, Ding,<sup>a</sup> Enguang Feng,<sup>a</sup> Haifeng, Sun,<sup>a</sup> Guannan,  
Liu,<sup>a</sup> Hualiang Jiang,<sup>a</sup> and Hong Liu<sup>\*a</sup>

<sup>a</sup>*Drug Discovery and Design Centre, State Key Laboratory of Drug Research, Shanghai Institute of  
Materia Medica, Shanghai Institutes for Biological Sciences, Chinese Academy of Sciences, 555 Zu  
chong zhi Road, Shanghai 201203, P. R. China*

<sup>b</sup>*Department of Medicinal Chemistry, China Pharmaceutical University, 24 Tong jia Xiang, Nanjing  
210009, P. R. China*

*Email: hliu@mail.shcnc.ac.cn*

#### Table of contents

|                                                |             |
|------------------------------------------------|-------------|
| <b>Experiment Section .....</b>                | <b>(S2)</b> |
| <b>Procedure for the Isotope Studies .....</b> | <b>(S2)</b> |
| <b>References .....</b>                        | <b>(S3)</b> |
| <b>NMR Spectra.....</b>                        | <b>(S4)</b> |

## Experiment Section

### Procedure for the Isotope Studies.

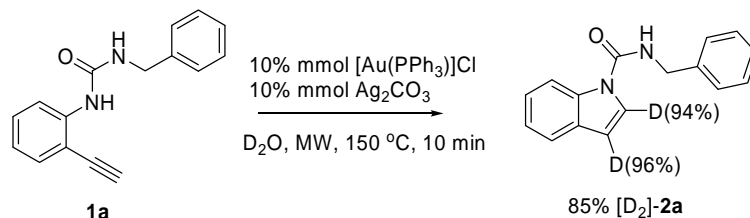

**Labeling studies with deuterated solvents.** A mixture of N'-benzyl N-(2-alkynylphenyl)ureas **1a** (0.1 mmol),  $[Au(PPh_3)]Cl$  (0.01 mmol) and  $Ag_2CO_3$  (0.01 mmol) was stirred in  $D_2O$  (2 mL) under Ar atmosphere. The vial was sealed and the mixture was then irradiated for 10 min at 150 °C. After the reaction was cooled to ambient temperature, the crude reaction mixture was extracted three times with EA (15 mL  $\times$  3). The combined organic phase was wash with saturated  $NaHCO_3$  solution, brine, dried with  $Na_2SO_4$  and concentrated. The residue was purified by column chromatography on combiflash to provide the desired product 4,5-bideuterated compound  $[D_2]-2a$ , which was analyzed using  $^1H$  NMR spectroscopy to determine the content of the deuterium incorporation.  $\delta$  (300 MHz,  $CDCl_3$ , ppm): 4.670 (d,  $J = 6.0$  Hz, 2H,  $CH_2$  of Bn), 5.882 (br, s, 1H, NH), 6.625 (s, 0.04H, C5-H), 7.208-7.266 (m, 1H), 7.322-7.424 (m, 6H), 7.462 (s, 0.06H, C4-H), 7.610 (d,  $J = 8.4$  Hz, 1H, ArH), 8.110 (d,  $J = 7.8$  Hz, 1H, ArH); LC-MS:  $m/z$  253  $[M + H]^+$  100%

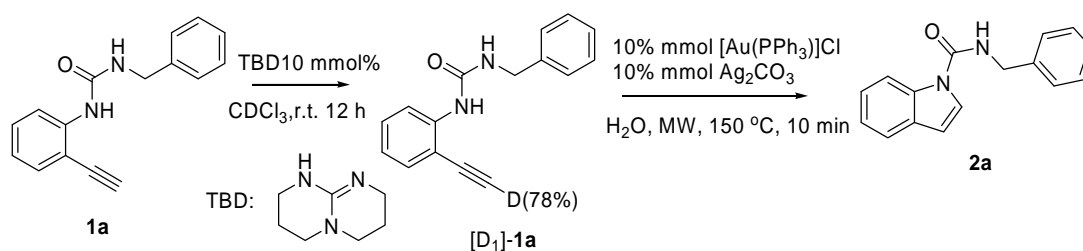

**Labeling studies with deuterated starting materials.** Deuterated N'-benzyl N-(2-alkynylphenyl)ureas  $[D_1]-1a$  was prepared in 85% yield with 78% deuterium incorporation at the terminal alkynyl site according to the method reported in ref S(1). A mixture of deuterated N'-benzyl N-(2-alkynylphenyl)ureas  $[D_1]-1a$  (0.1 mmol),  $[Au(PPh_3)]Cl$  (0.01 mmol) and  $Ag_2CO_3$  (0.01 mmol) was stirred in  $H_2O$  (2 mL) under Ar atmosphere. The vial was sealed and the mixture was then irradiated for 10 min at 150 °C. After the reaction was cooled to ambient temperature, the crude reaction mixture was extracted three times with

EA (15 mL × 3). The combined organic phase was wash with saturated NaHCO<sub>3</sub> solution, brine, dried with Na<sub>2</sub>SO<sub>4</sub> and concentrated. The residue was purified by column chromatography on combiflash to provide the desired product. **2a**, which was analyzed using <sup>1</sup>H NMR spectroscopy to determine the content of the deuterium incorporation.

[D<sub>1</sub>]-**1a**: <sup>1</sup>H NMR δ (300 MHz, CDCl<sub>3</sub>, ppm): 3.337 (s, 0.22 H, C≡C-H), 4.470 (d, *J* = 5.4 Hz, 2H, CH<sub>2</sub> of Bn), 5.173 (br, 1H), 6.962 (t, *J* = 8.1 Hz, 1H), 7.069 (br, 1H), 7.303-7.424 (m, 7H), 8.160 (d, *J* = 8.4 Hz, 1H); LC-MS *m/z* 252 100%, 251 35% [M + H]<sup>+</sup>.

## References:

[S1] Sabot, C.; Kumar, K. A.; Antherume, C.; Mioskowski, C. *J. Org. Chem.* **2007**, *72*, 5001-5007.

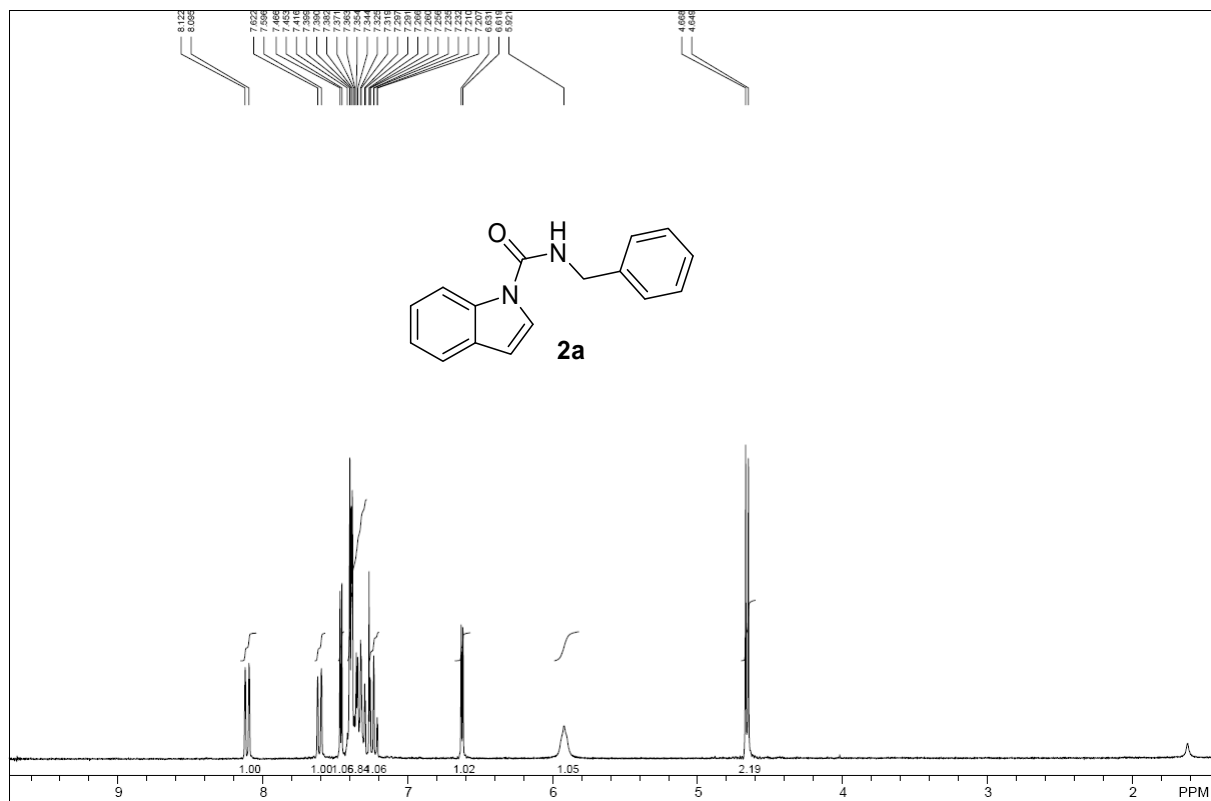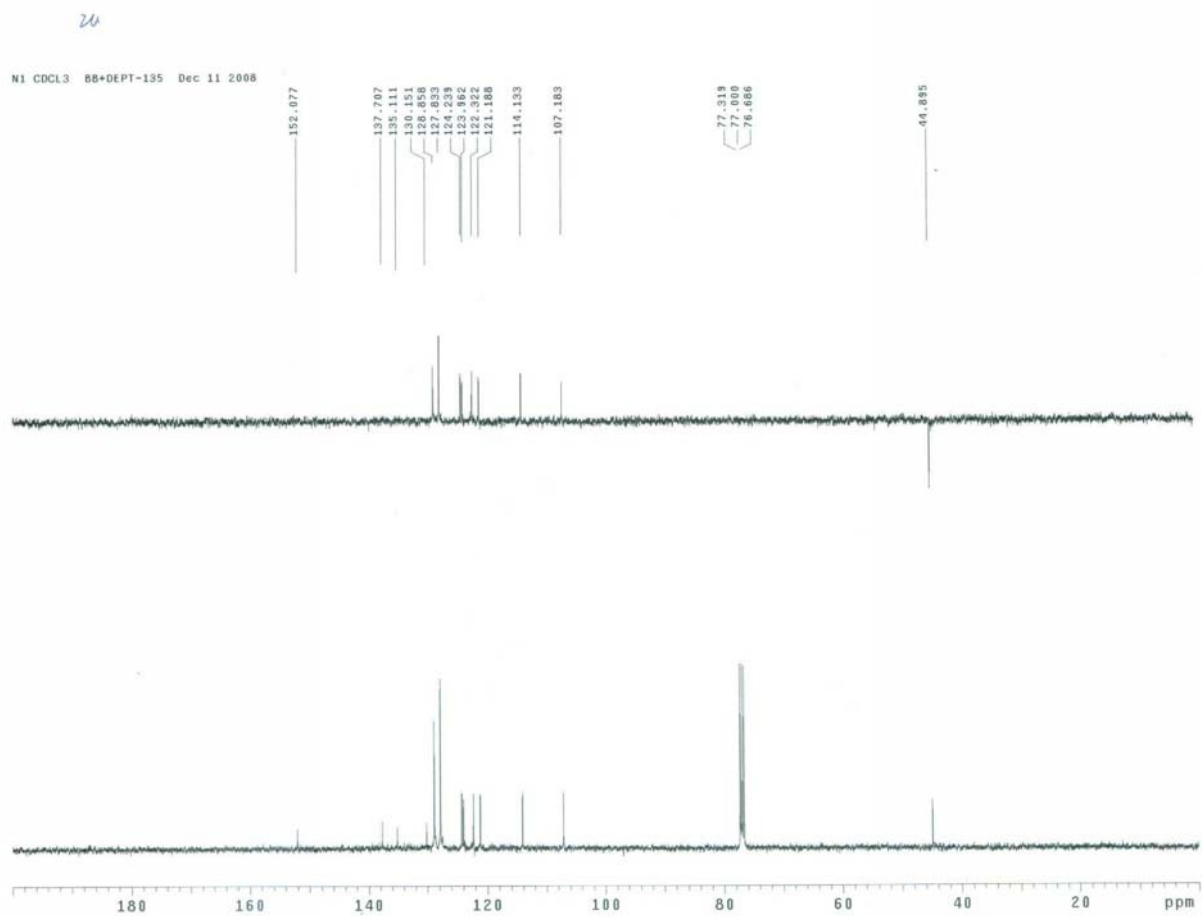

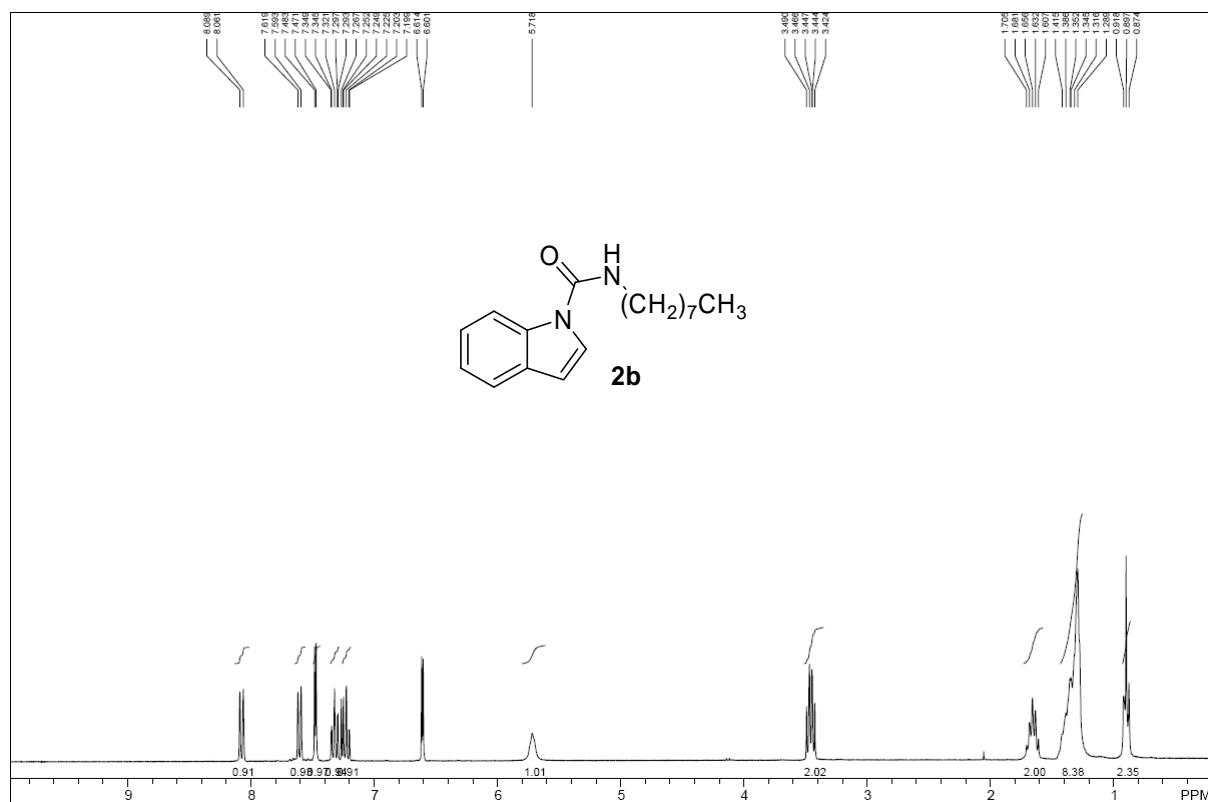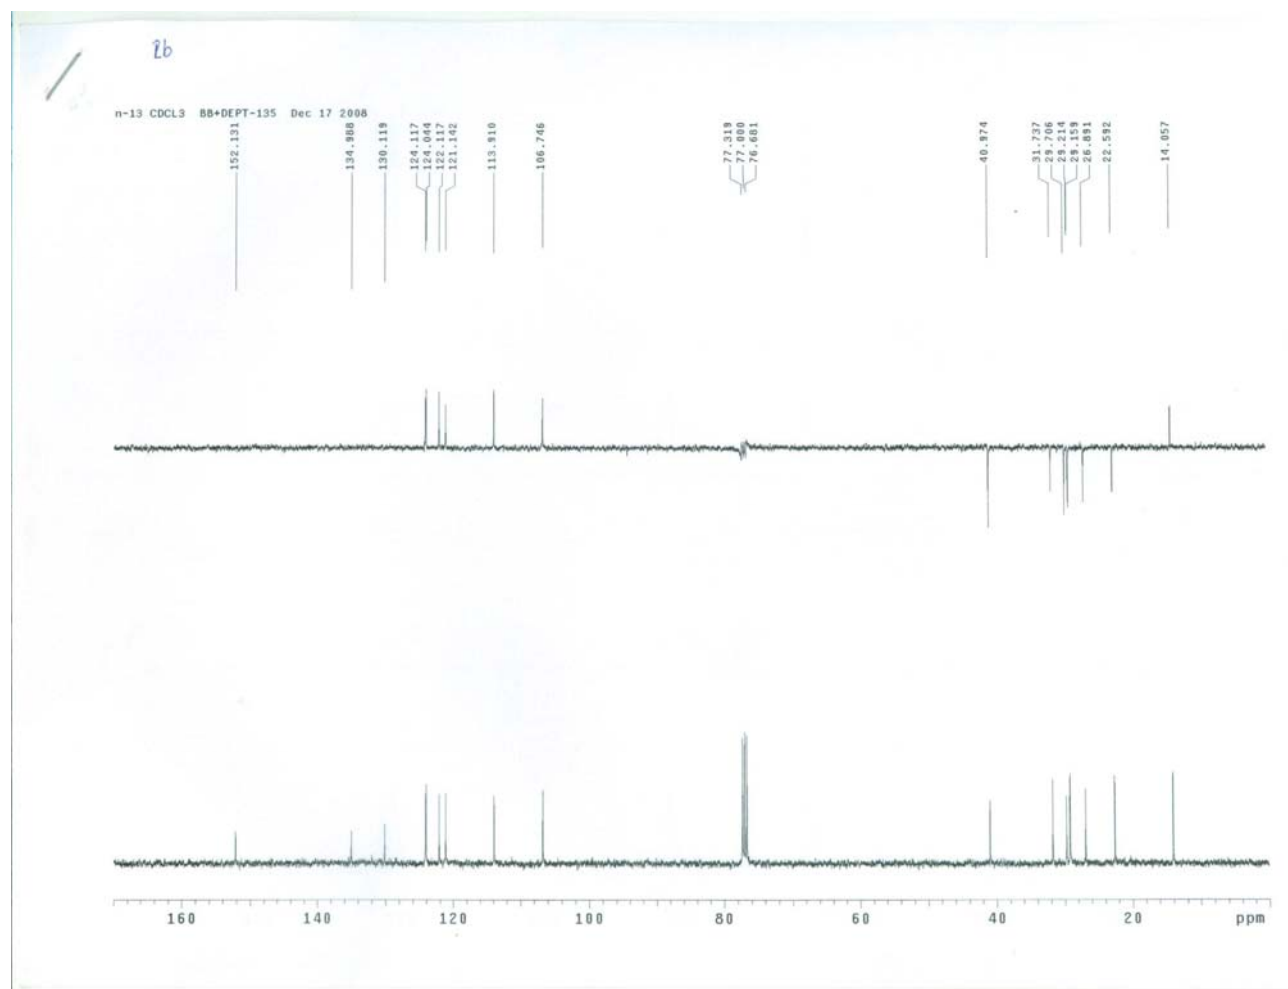



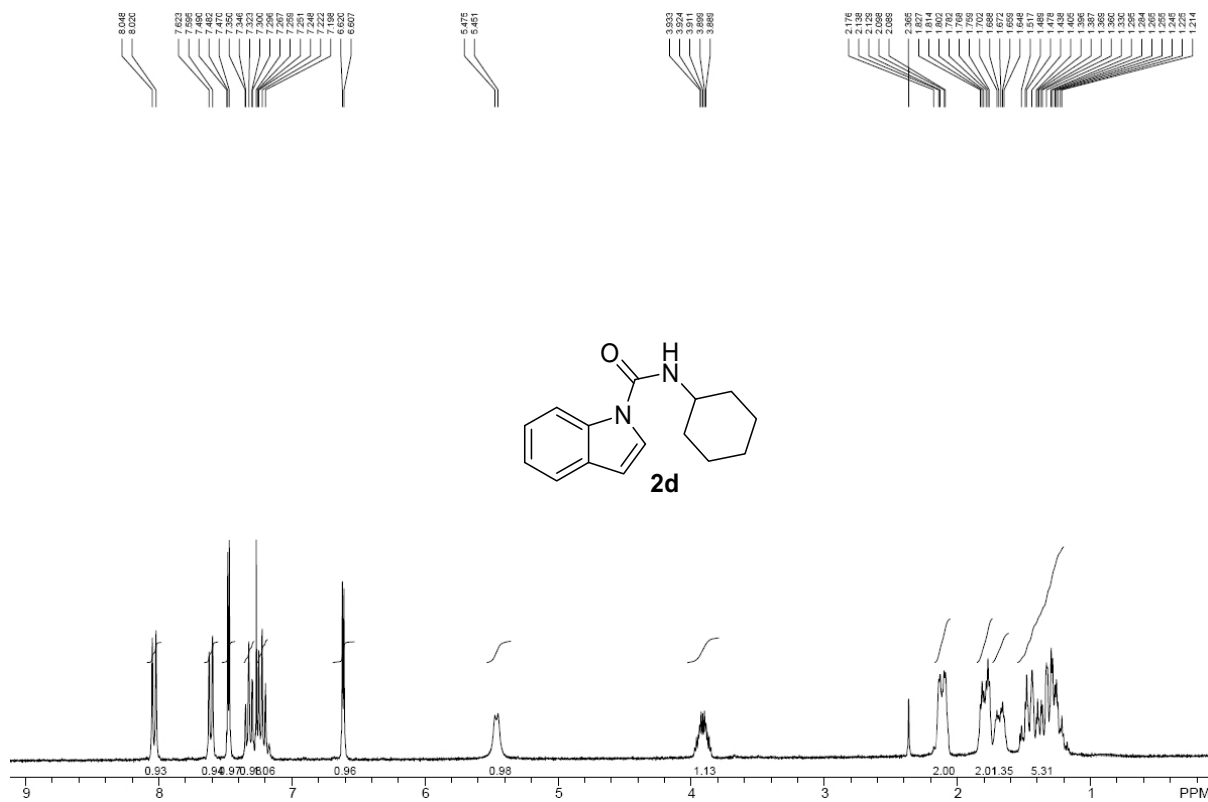

n-11 CDCl<sub>3</sub> 88+DEPT-135 Dec 19 2008

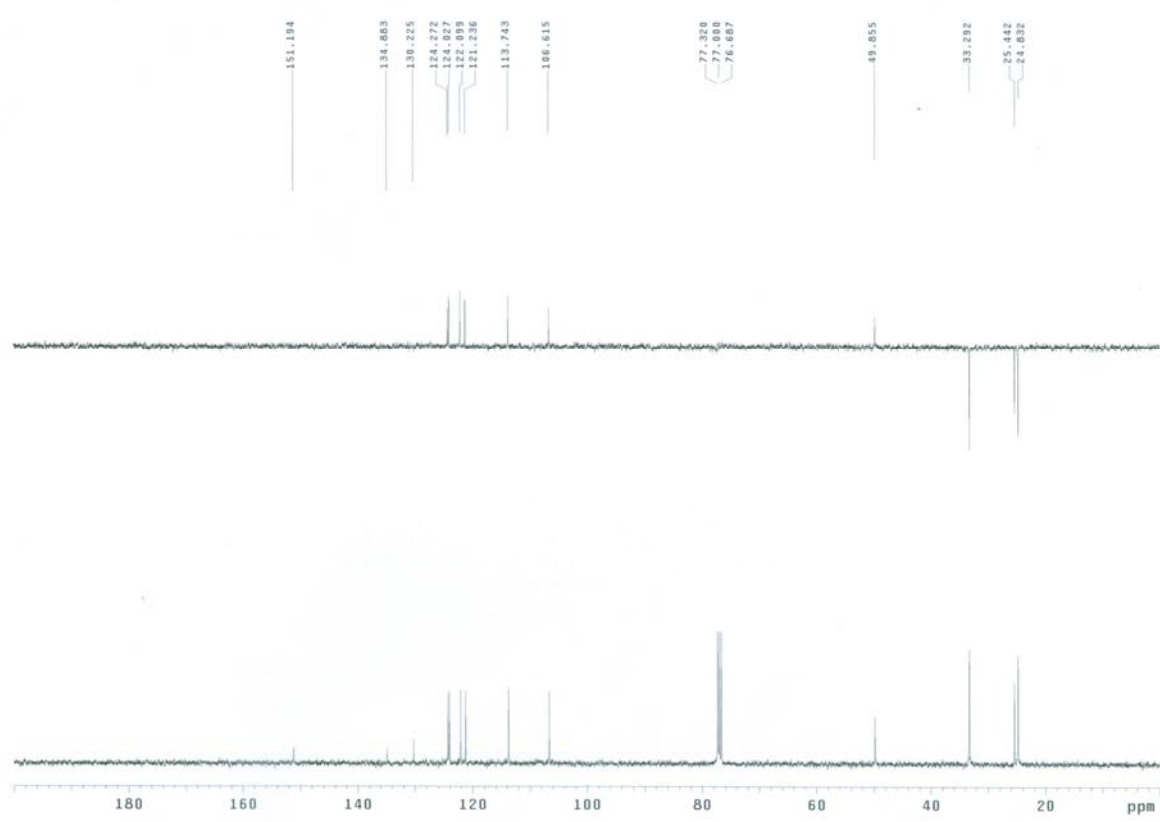

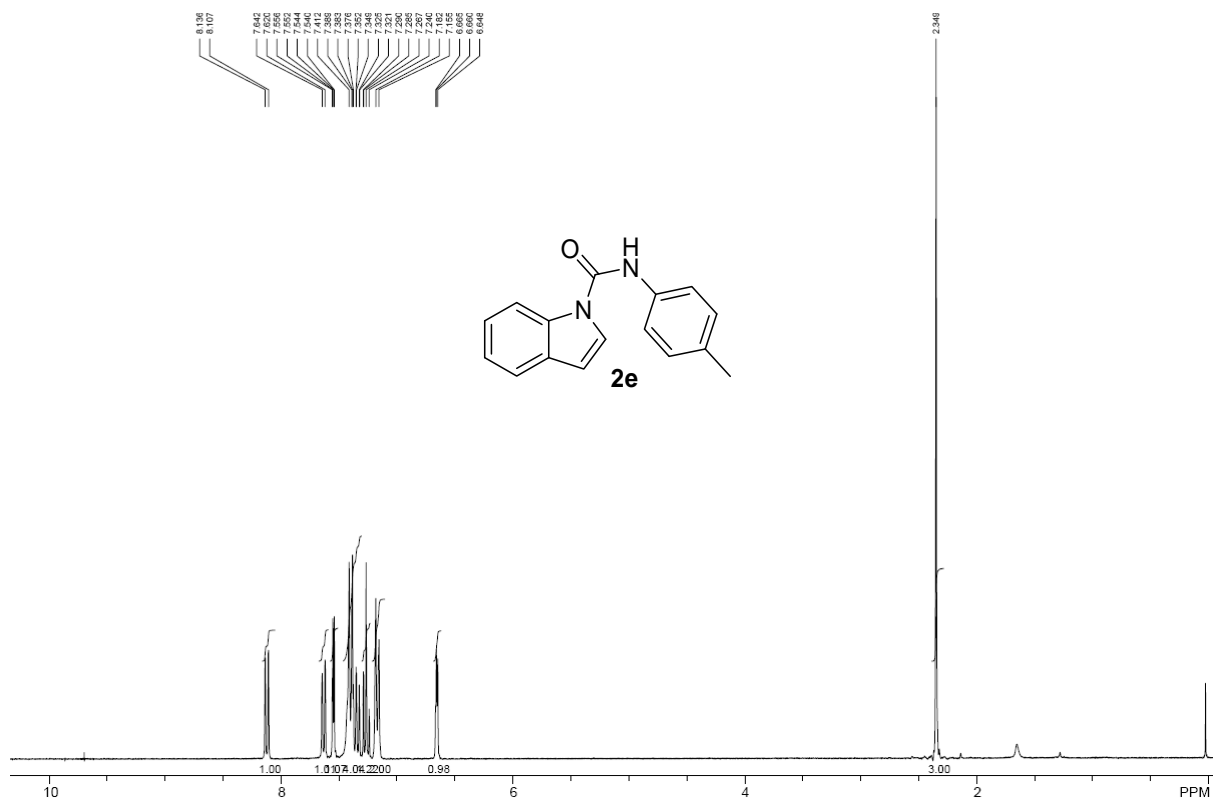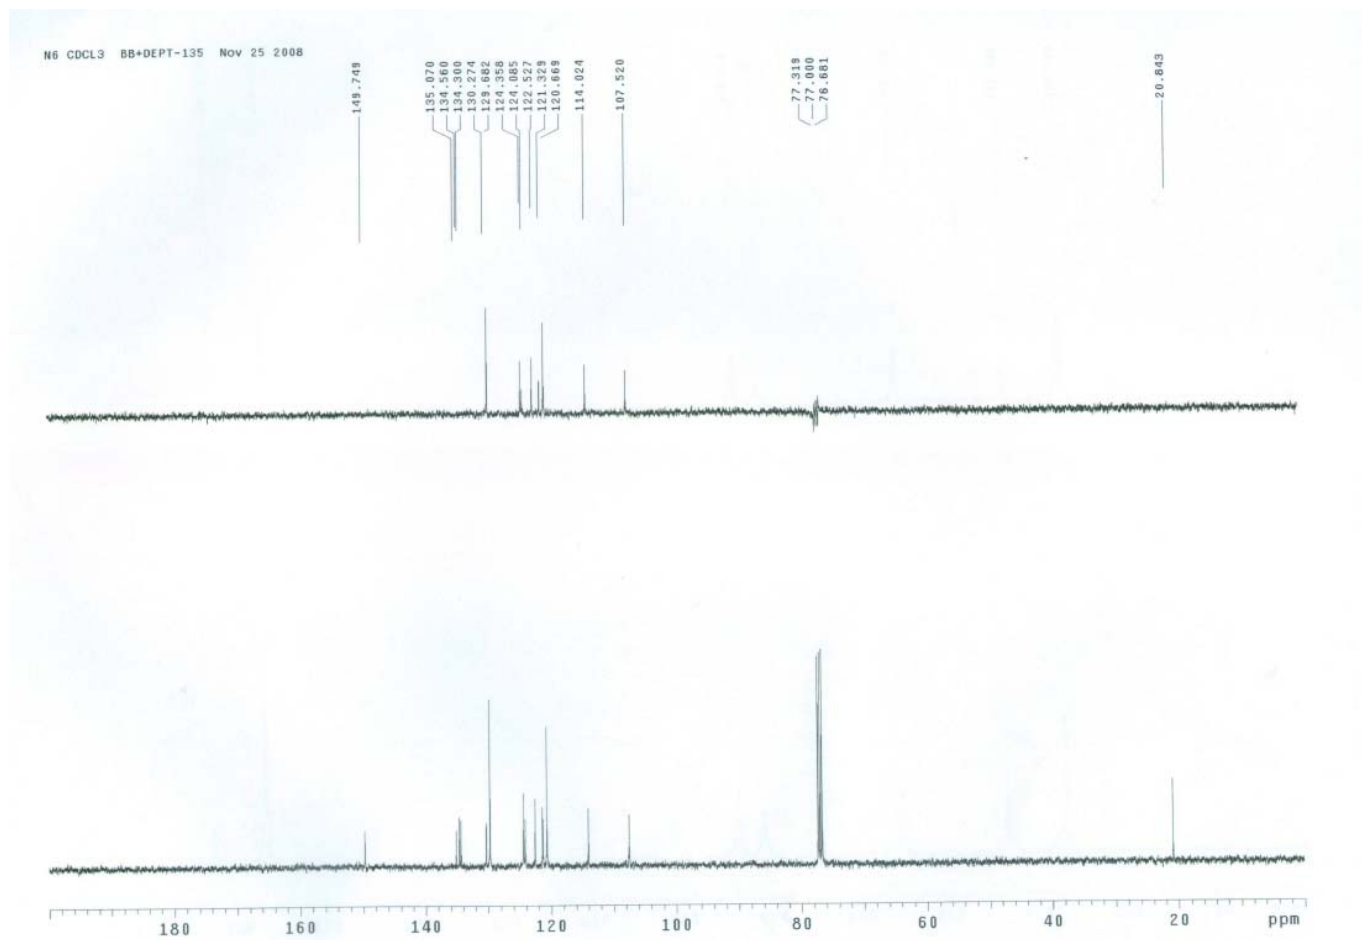



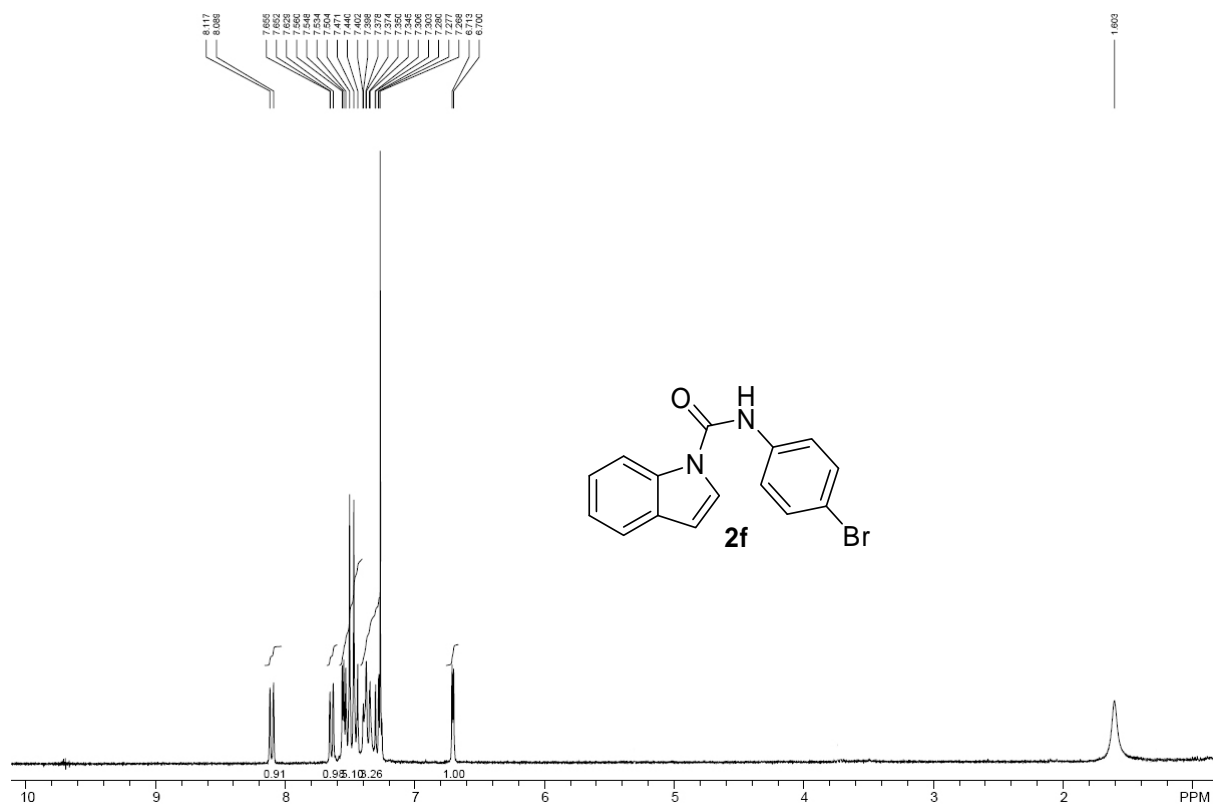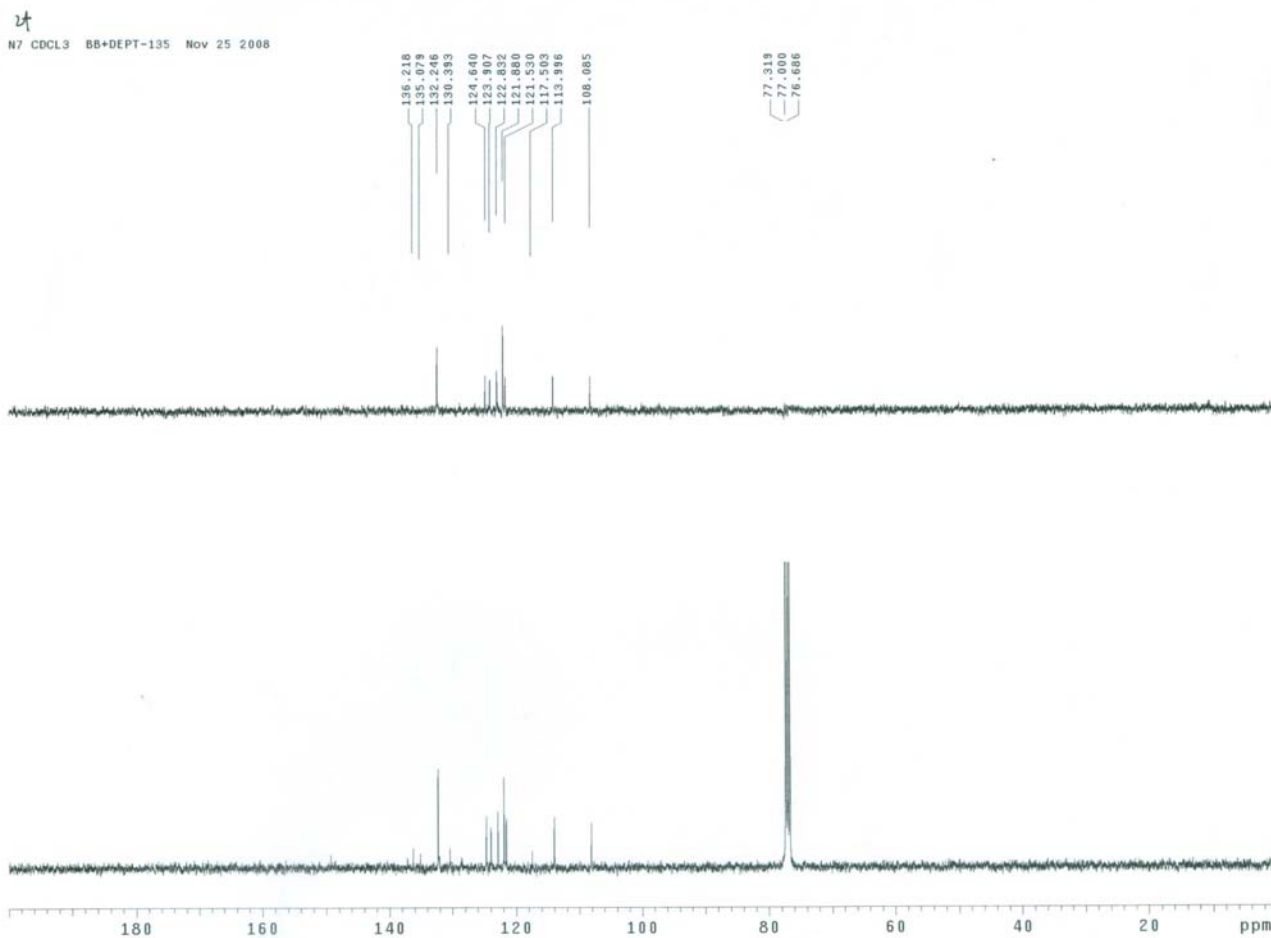

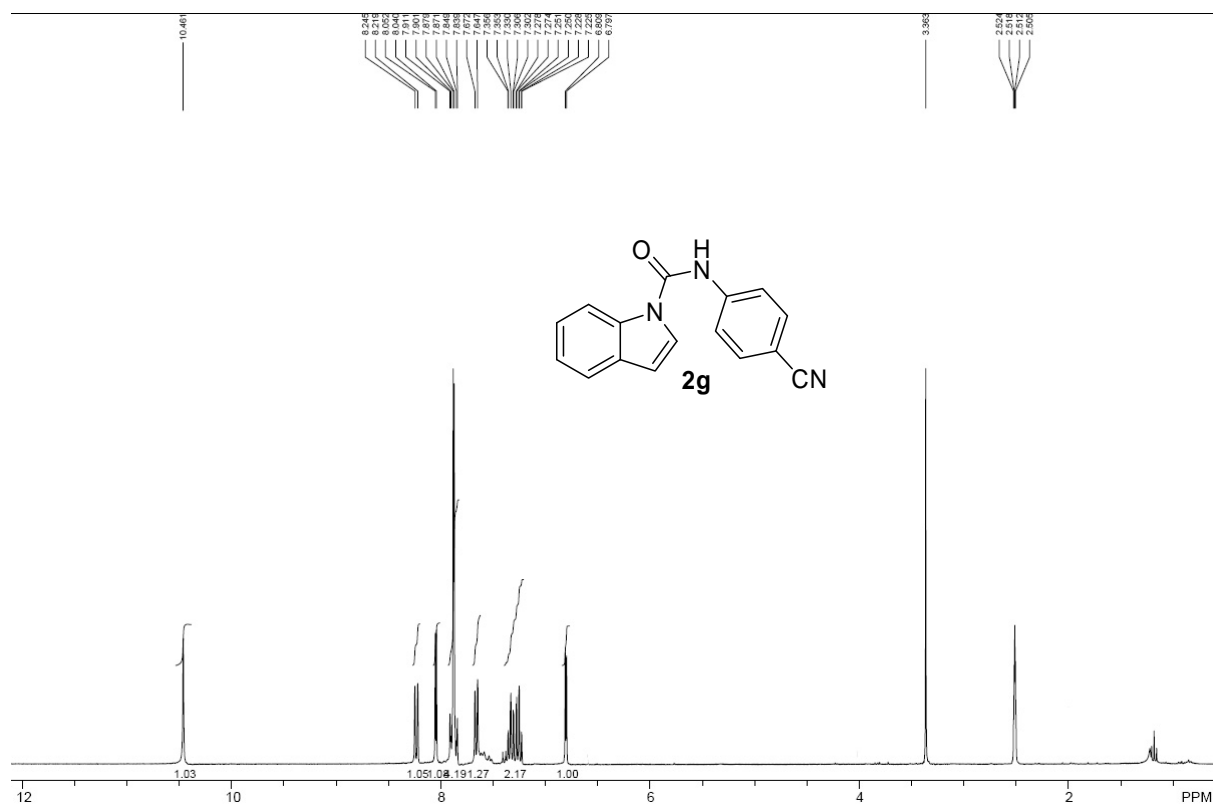

h-9 DMSO-d<sub>6</sub> 5B+DEPT-135 Dec 19 2008

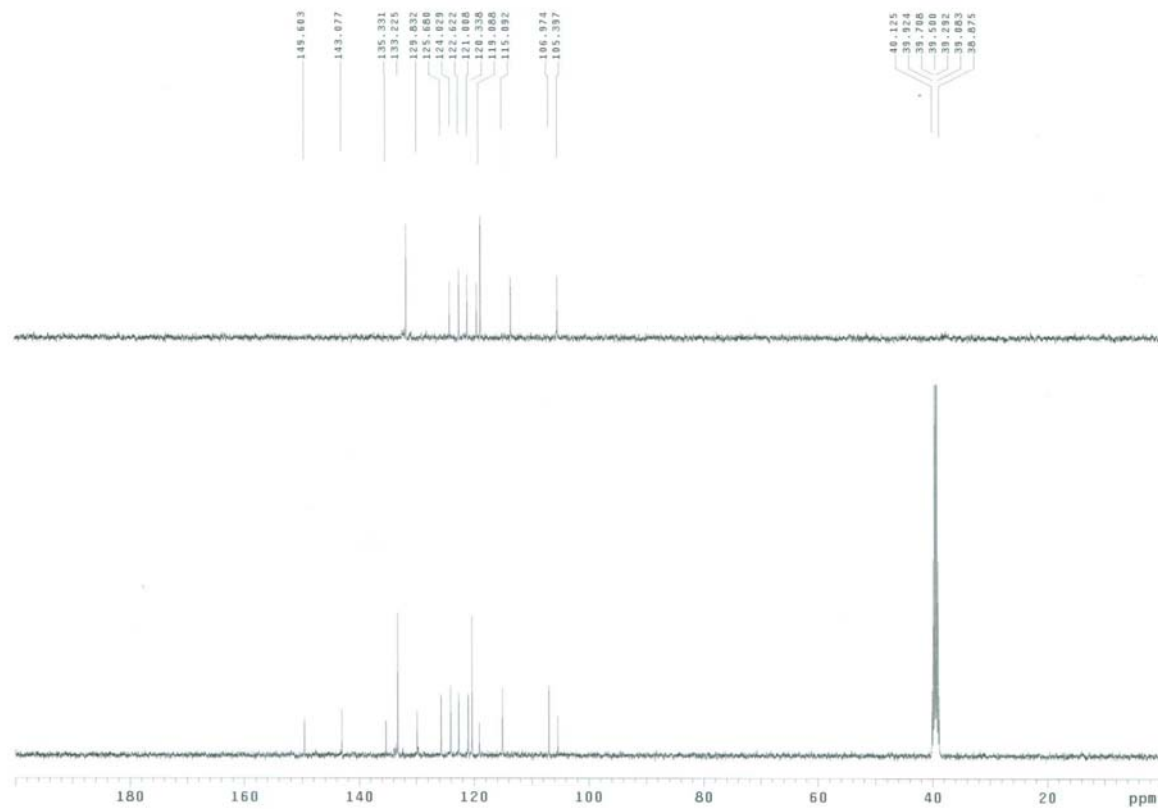

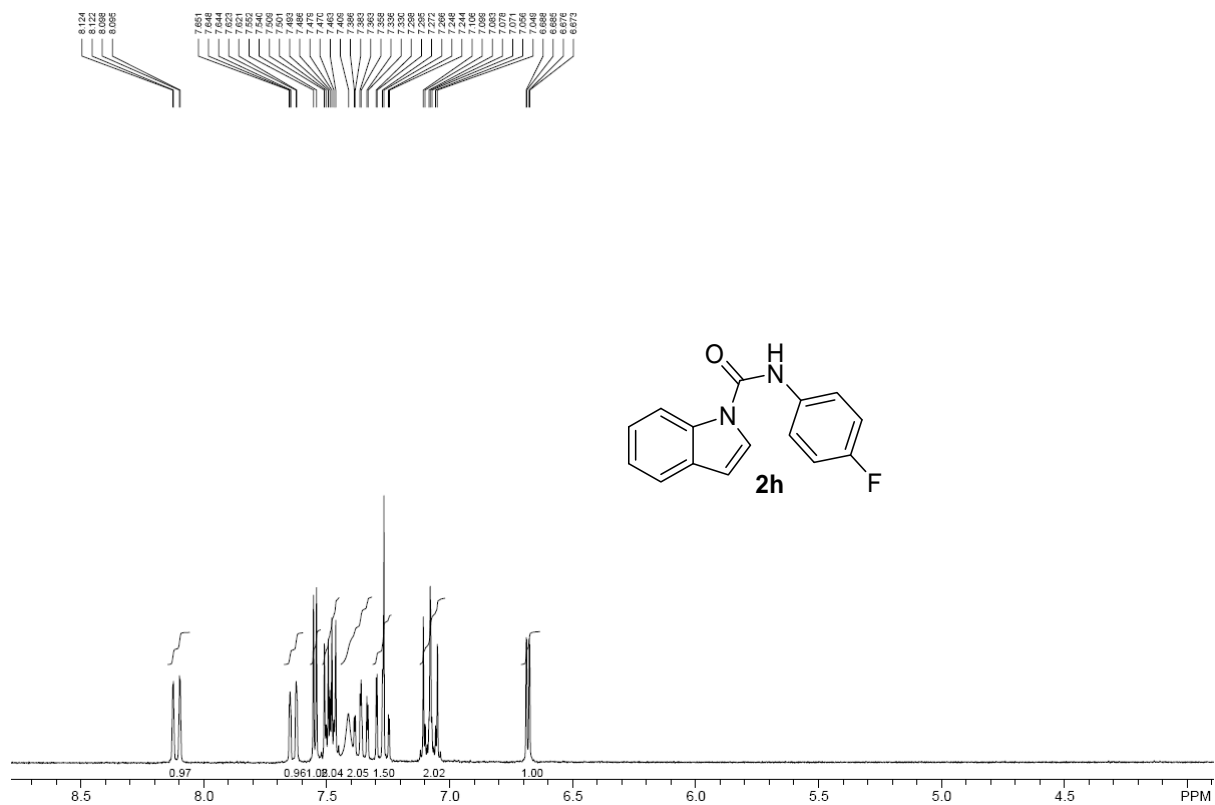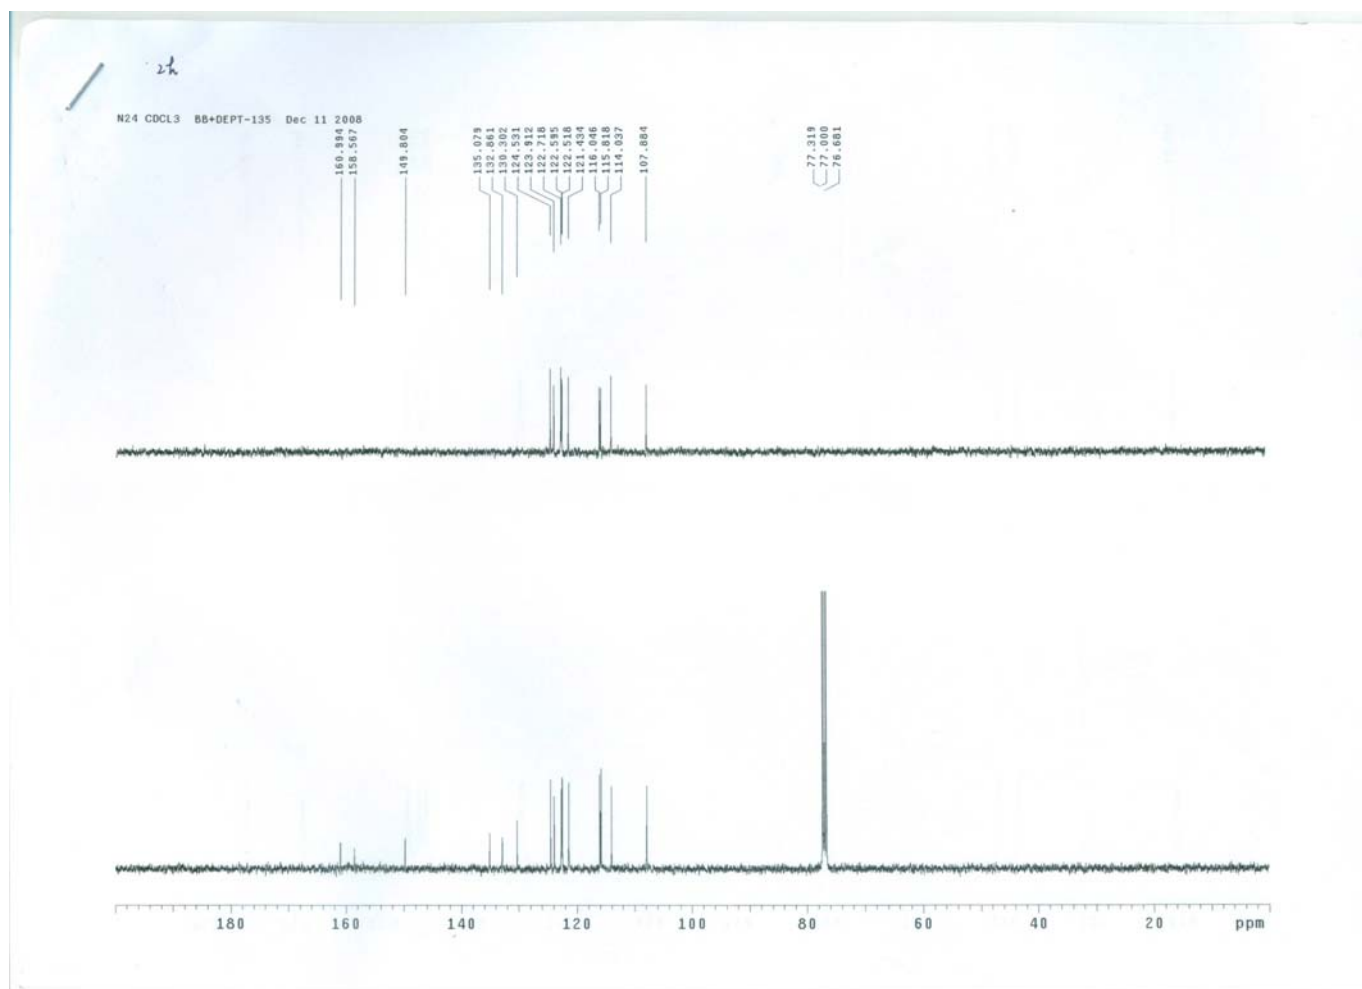

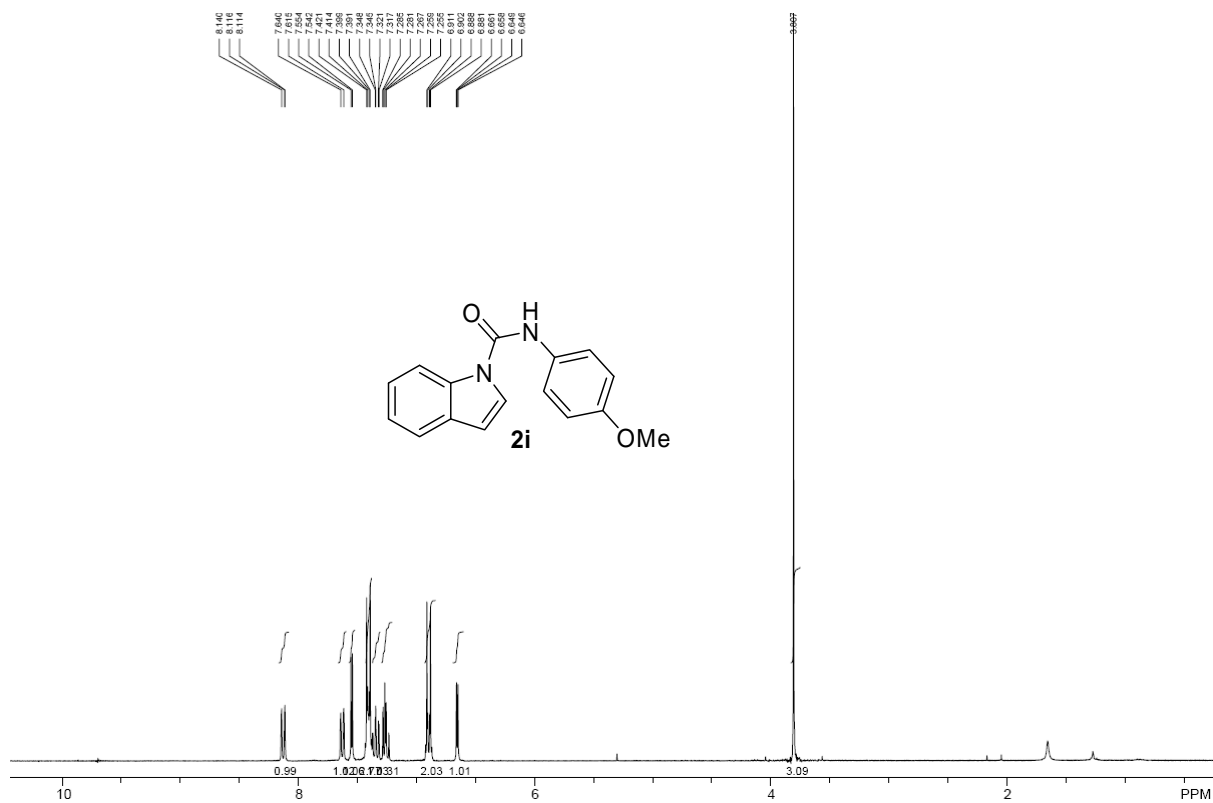

2i

N3 CDCL3 BB+DEPT-135 Nov 20 2008

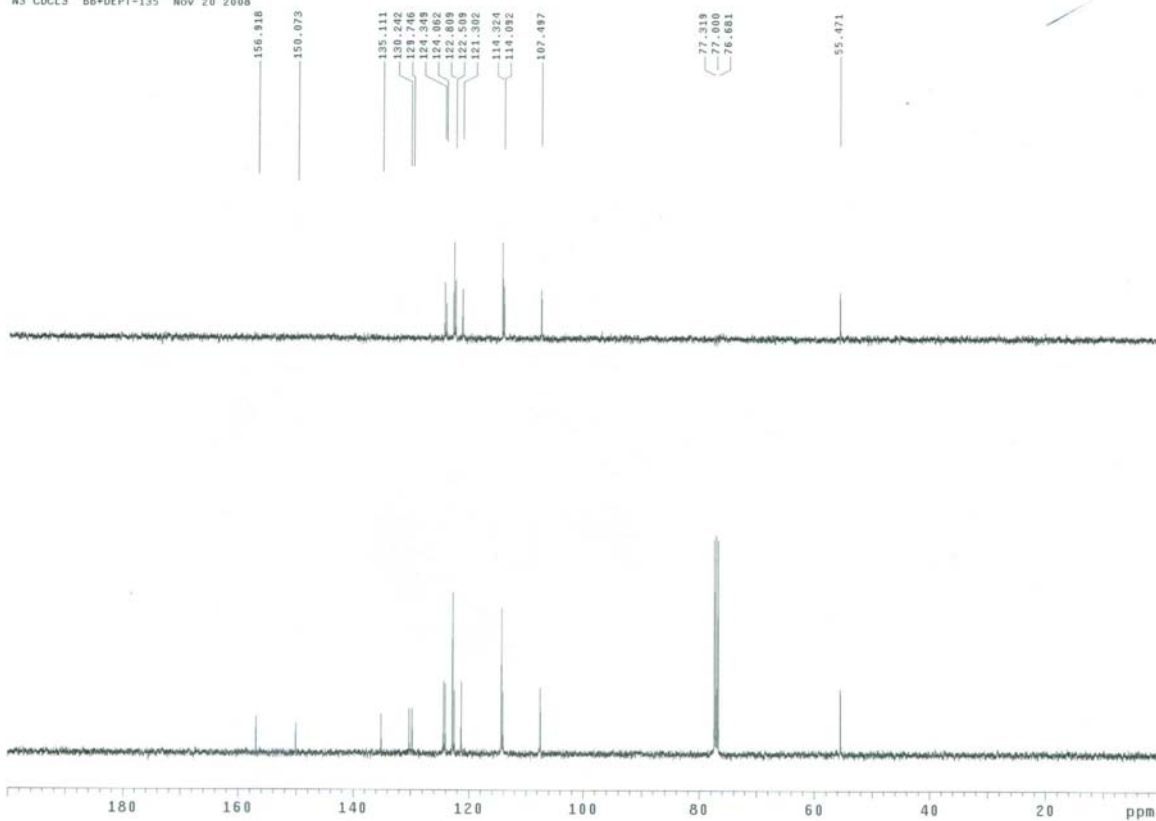

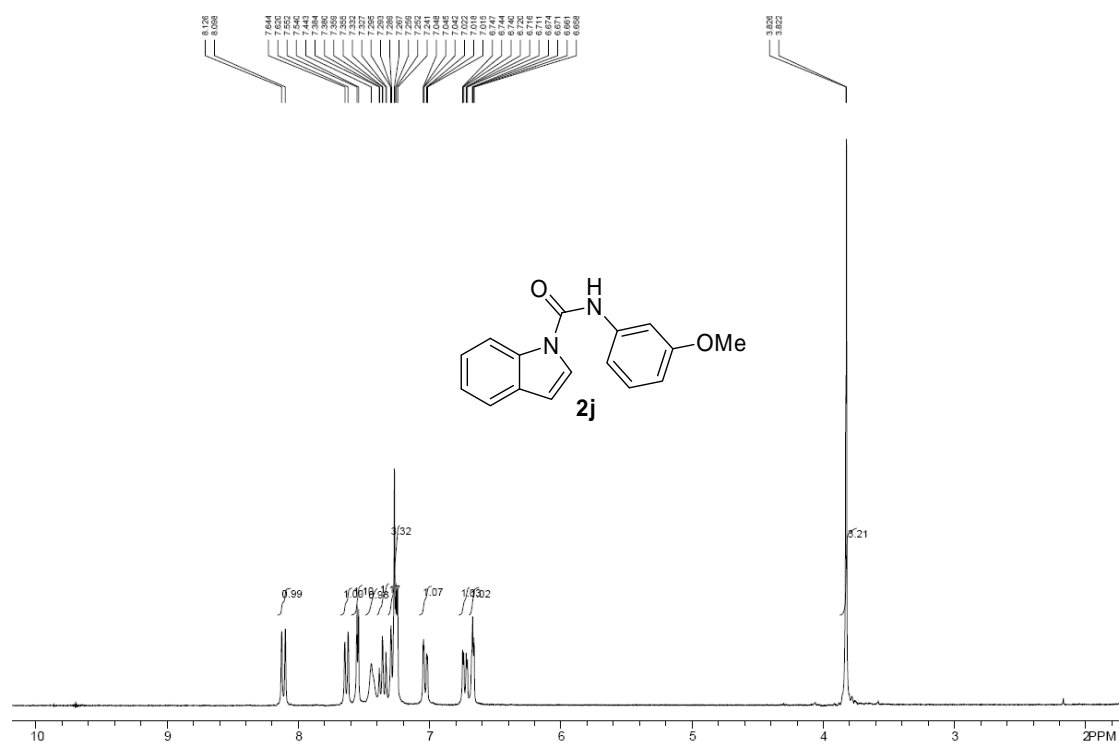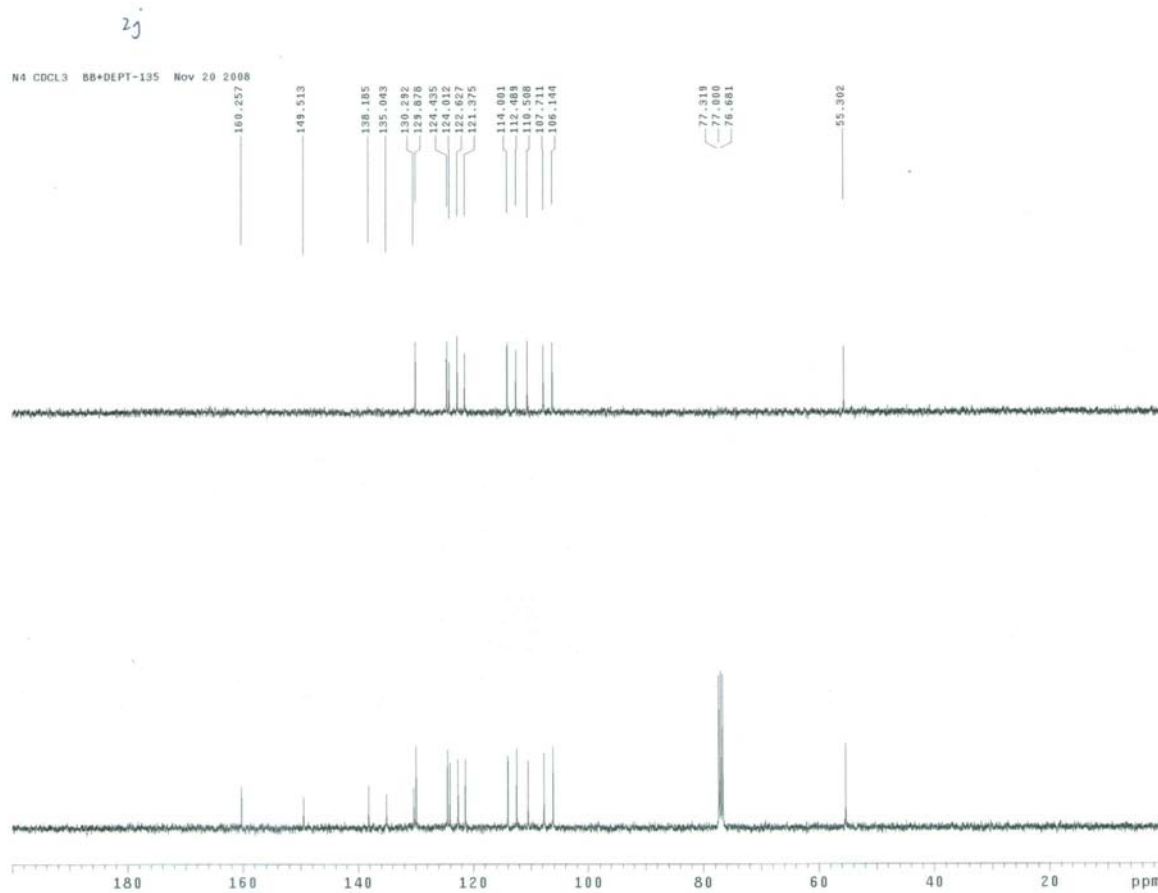



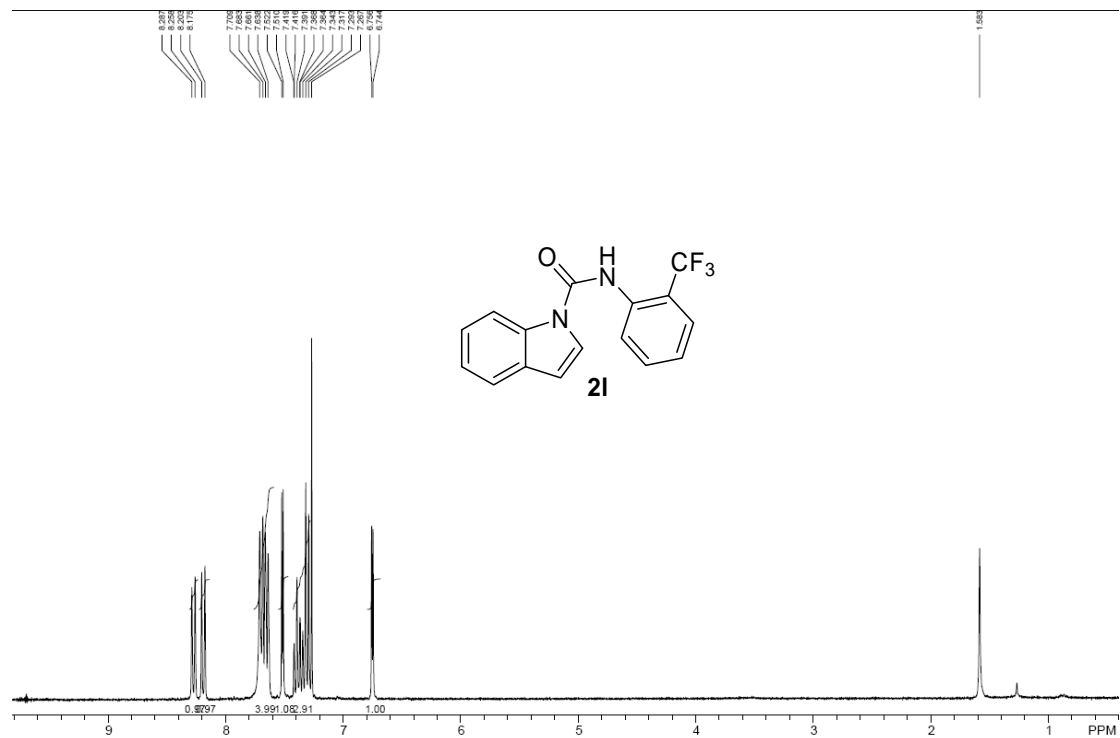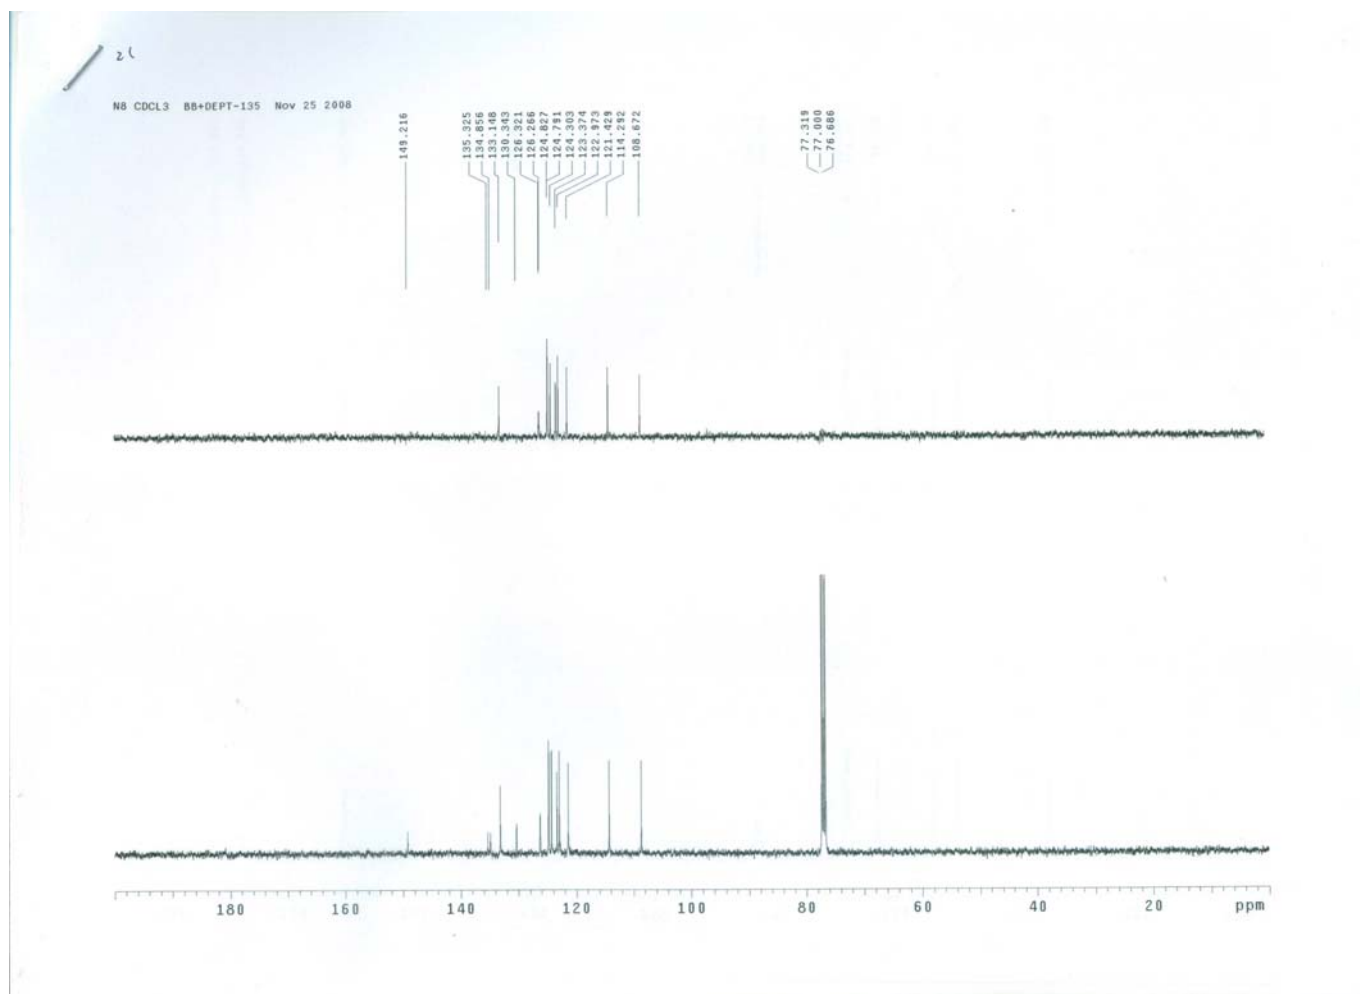

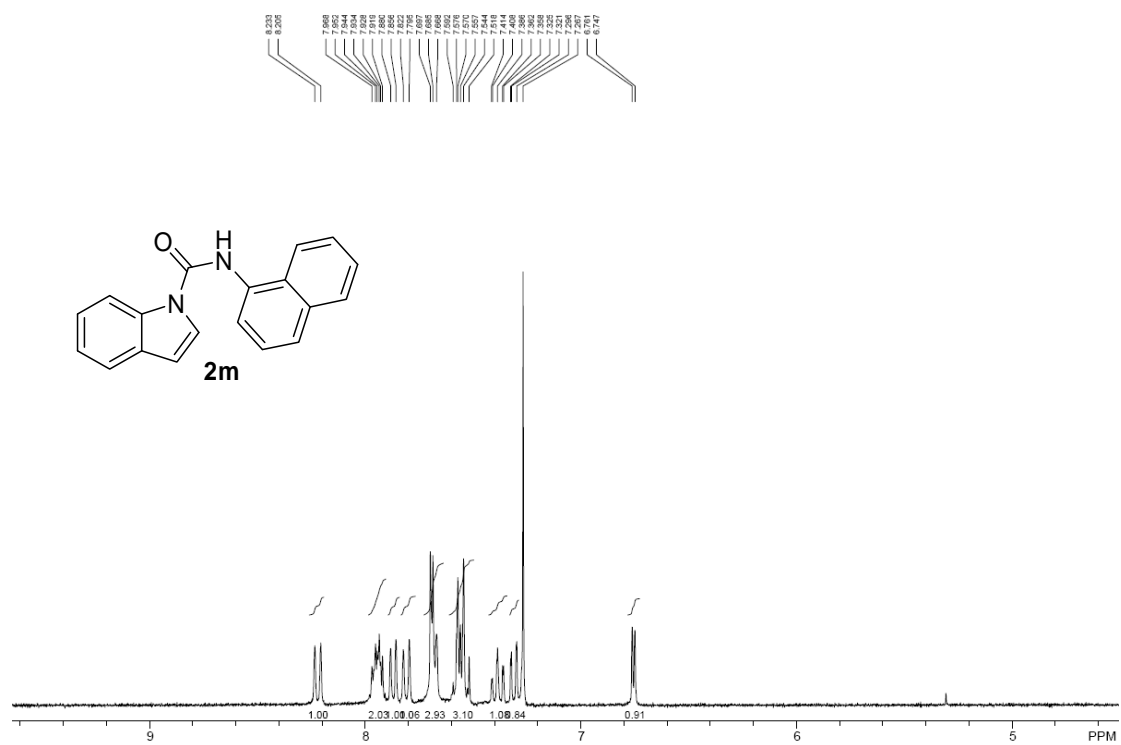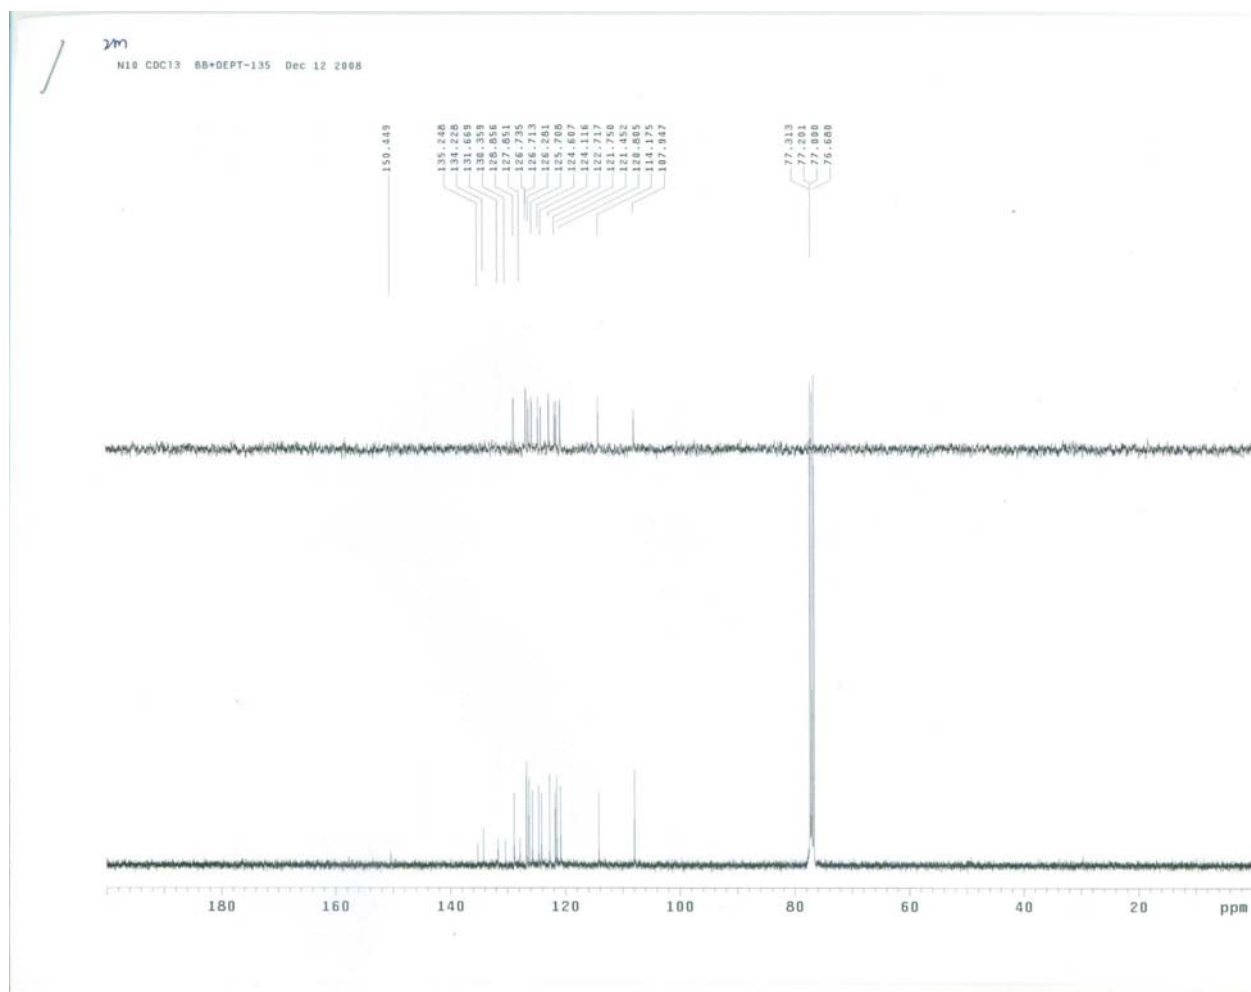



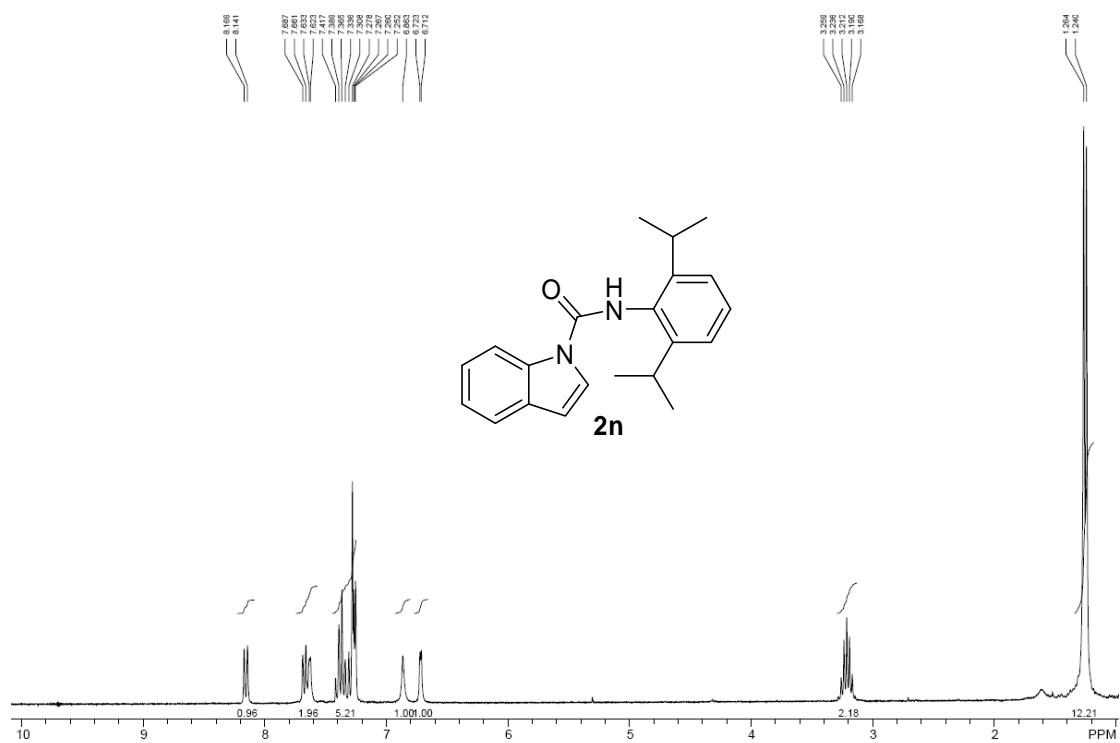

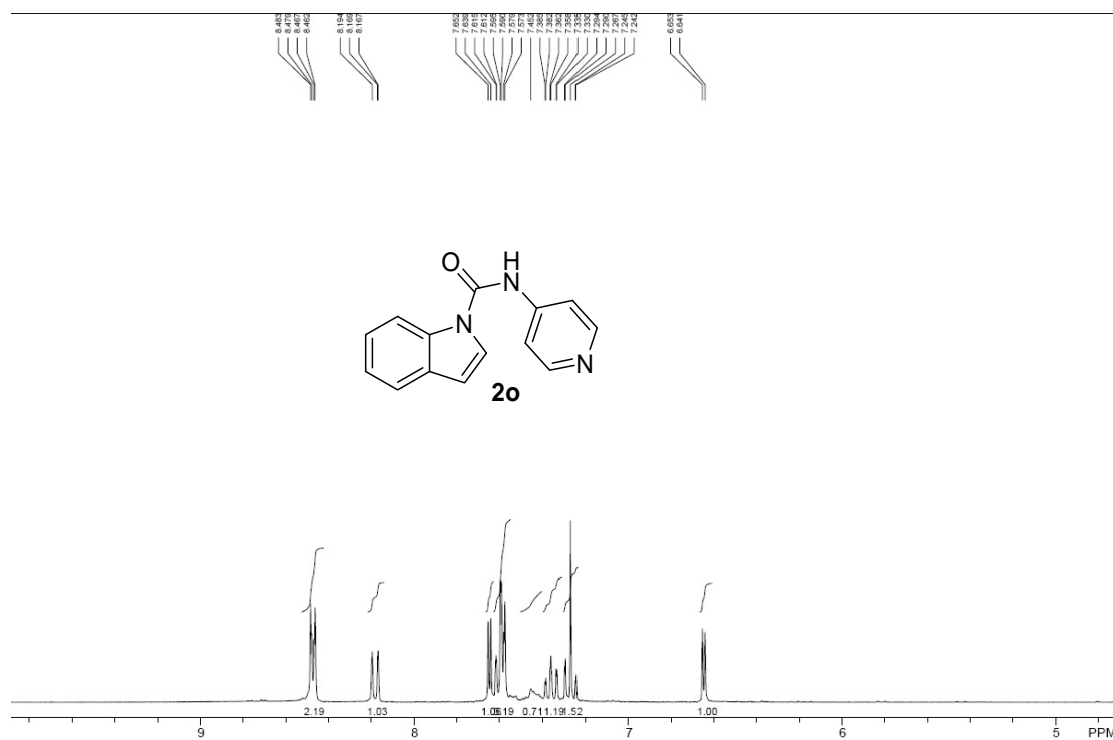

20

n-14 CDC13 BB+DEPT-135 Dec 30 2008

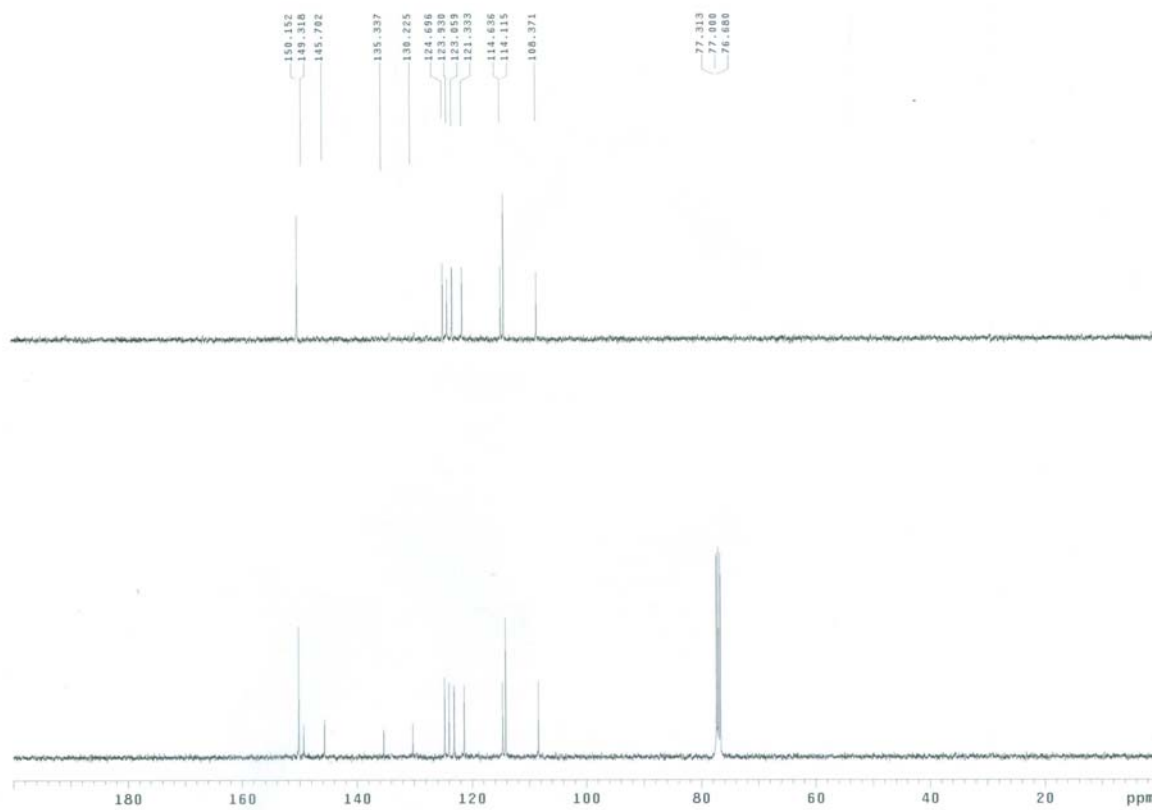

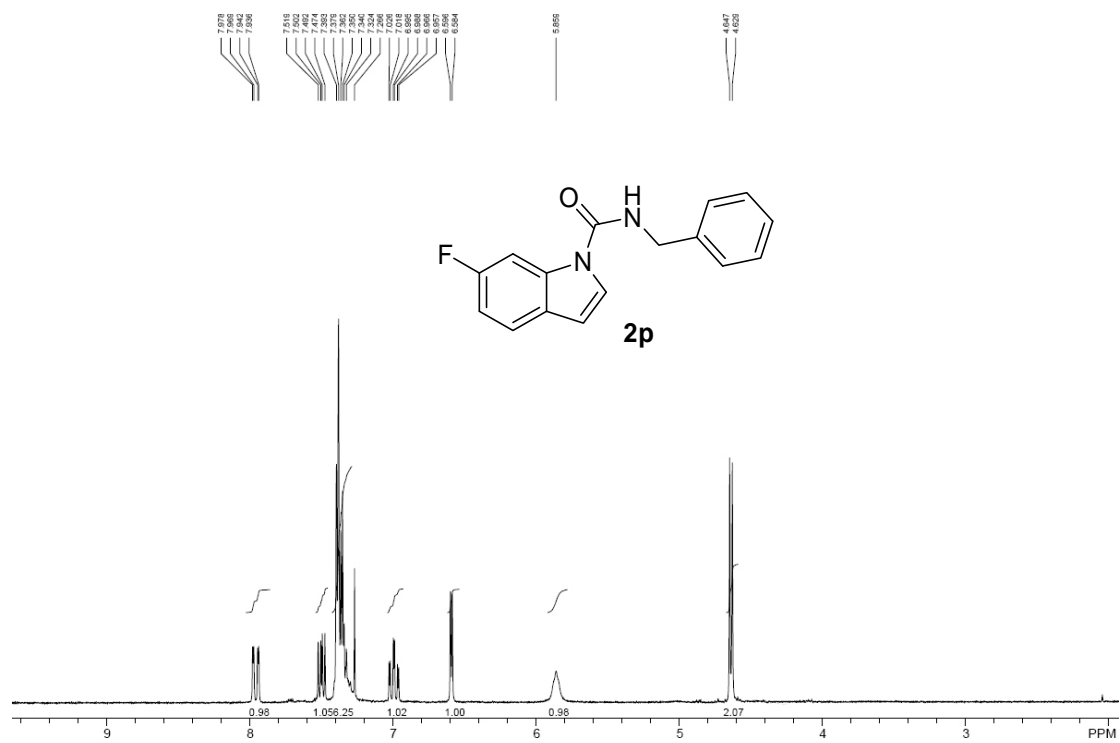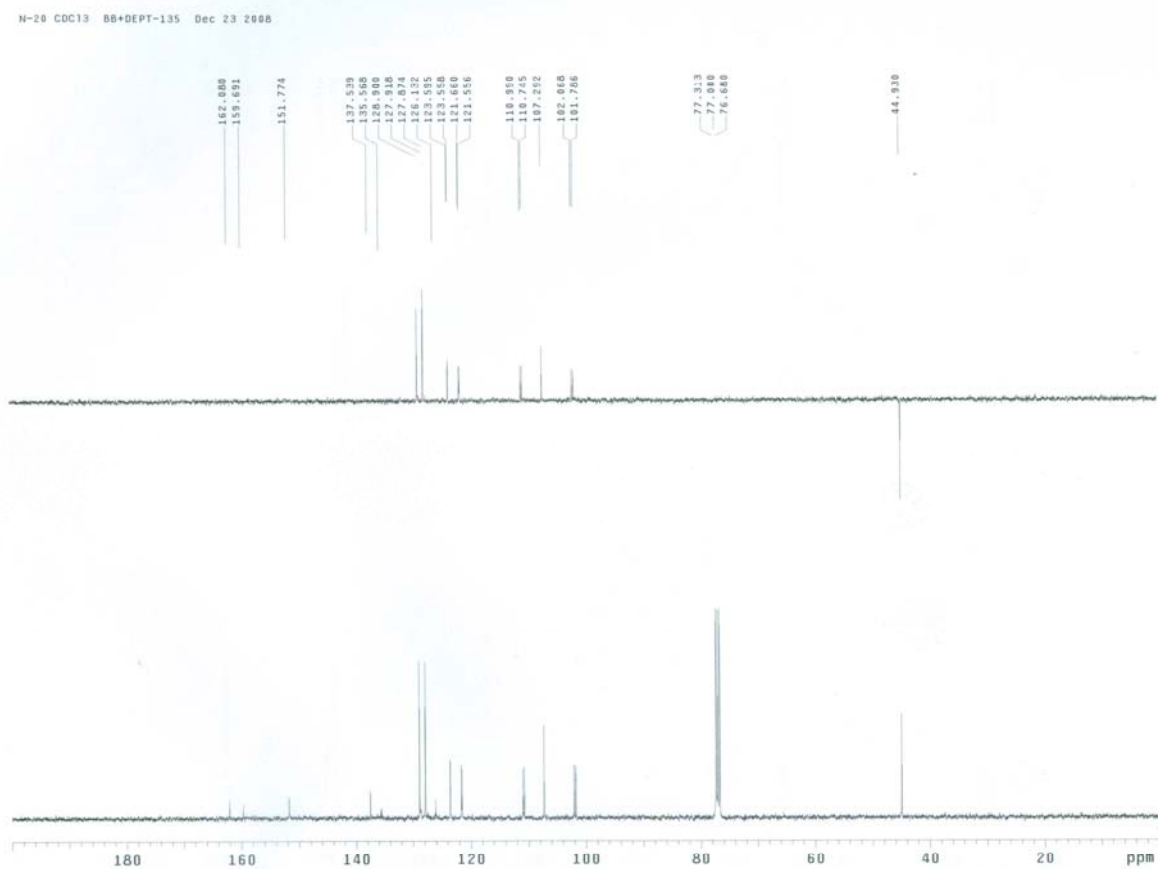

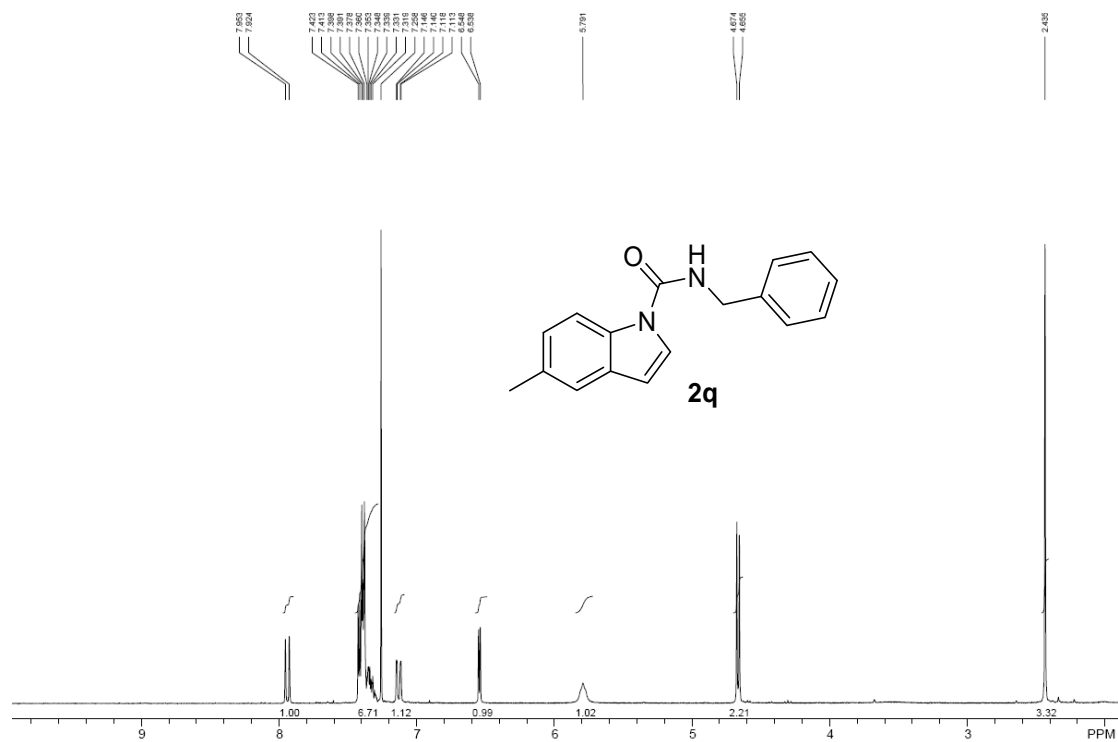

29

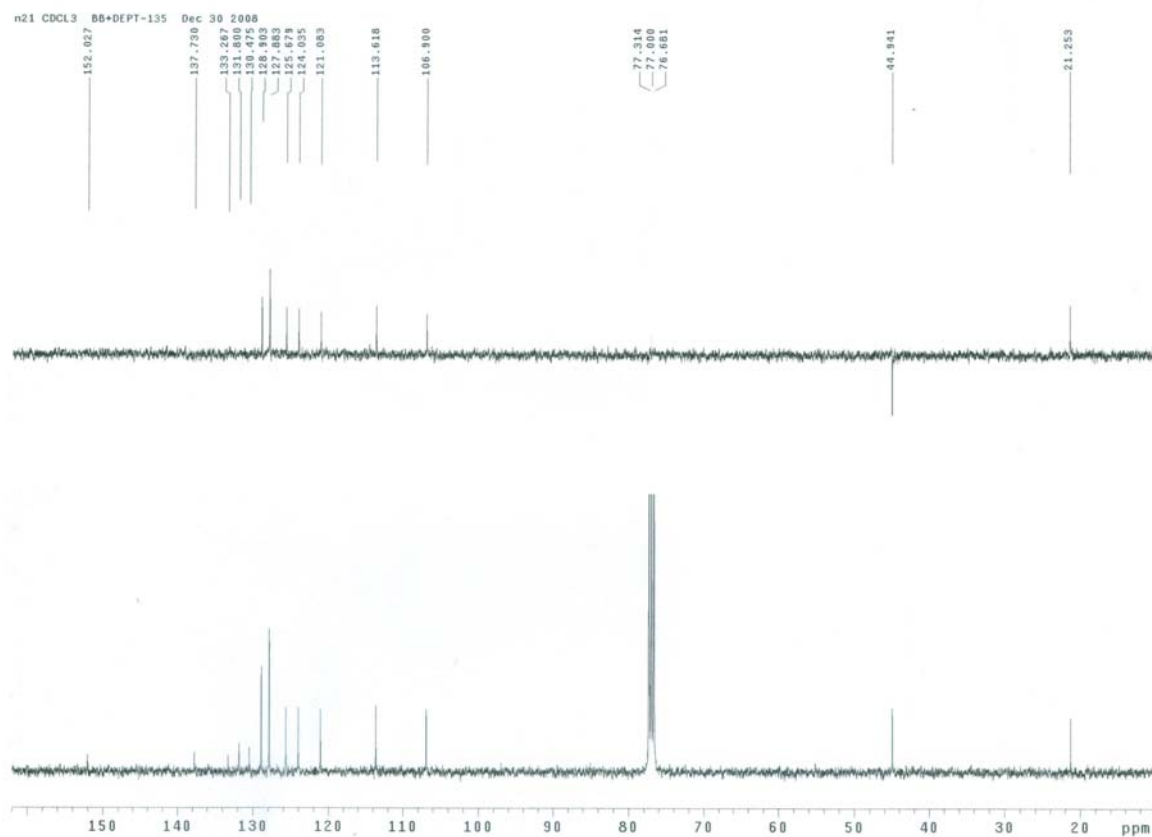

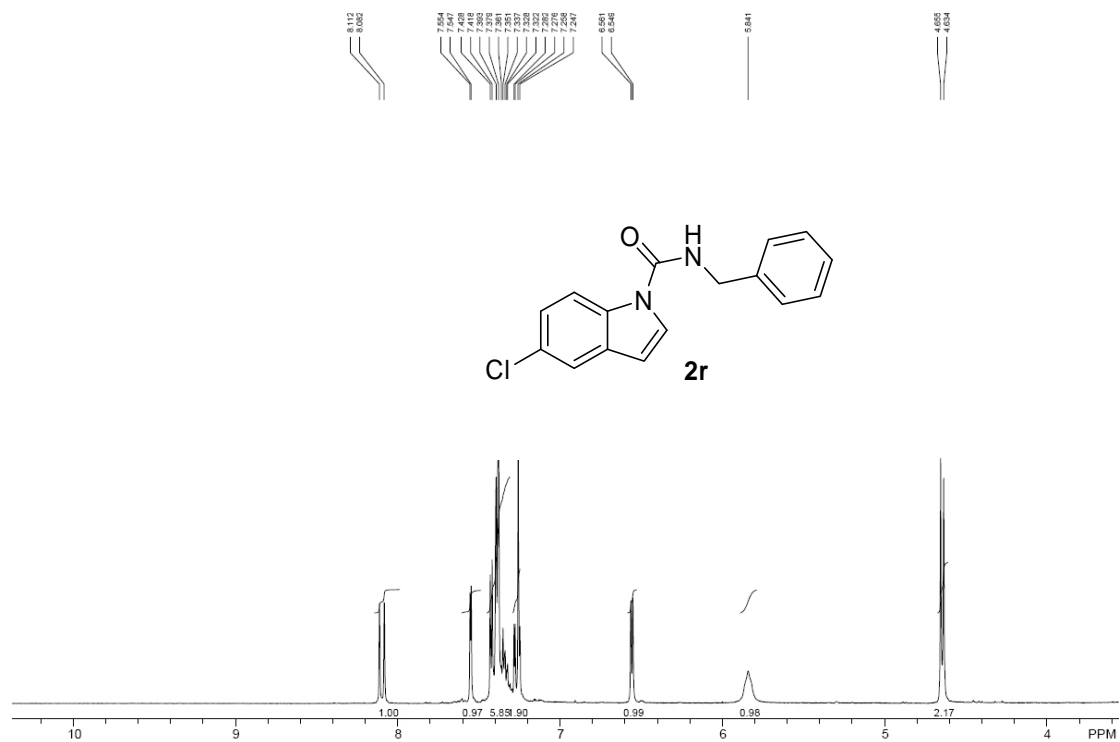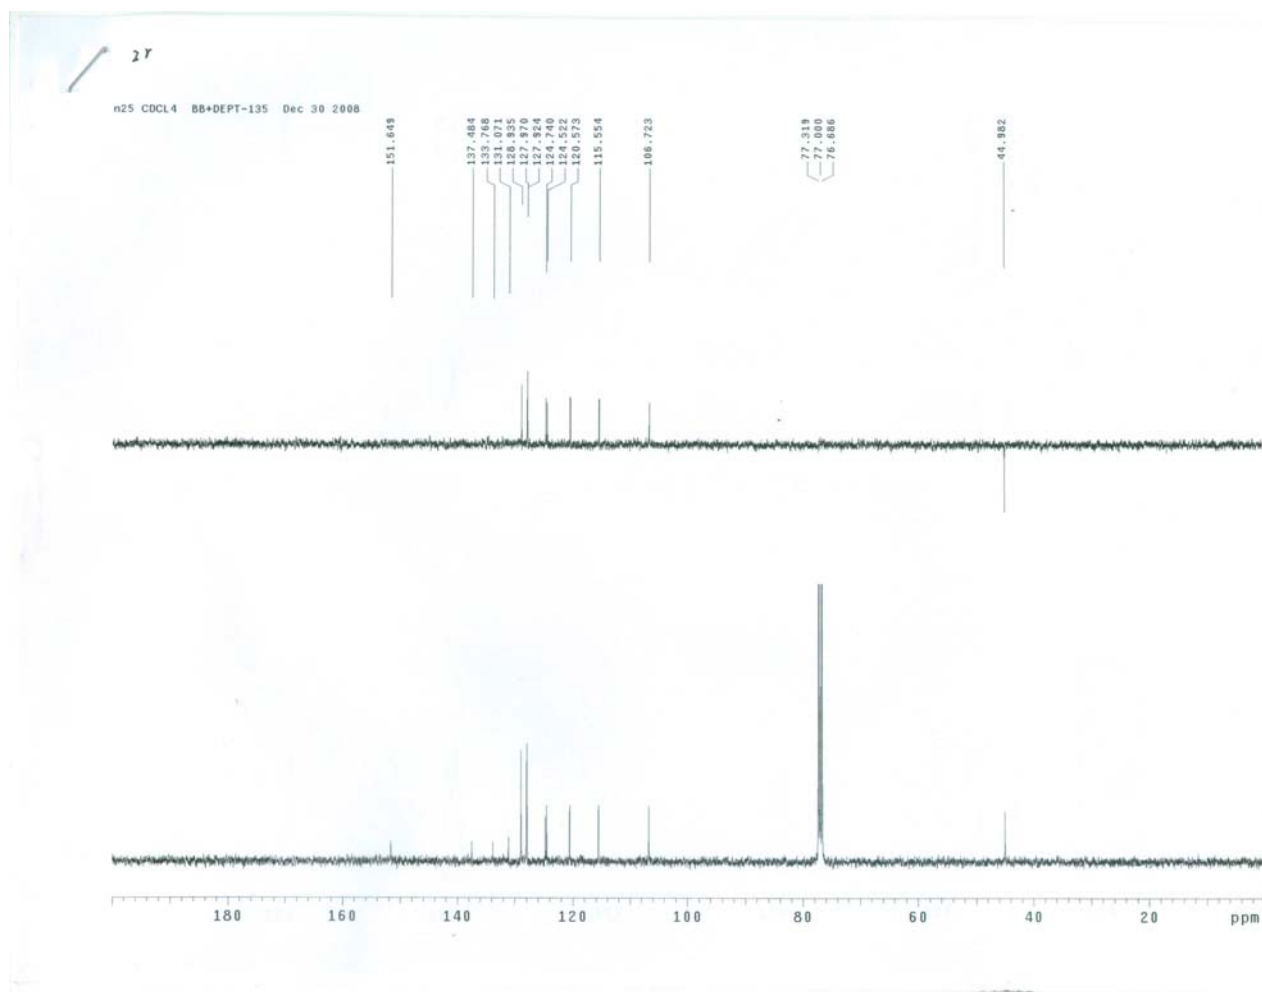

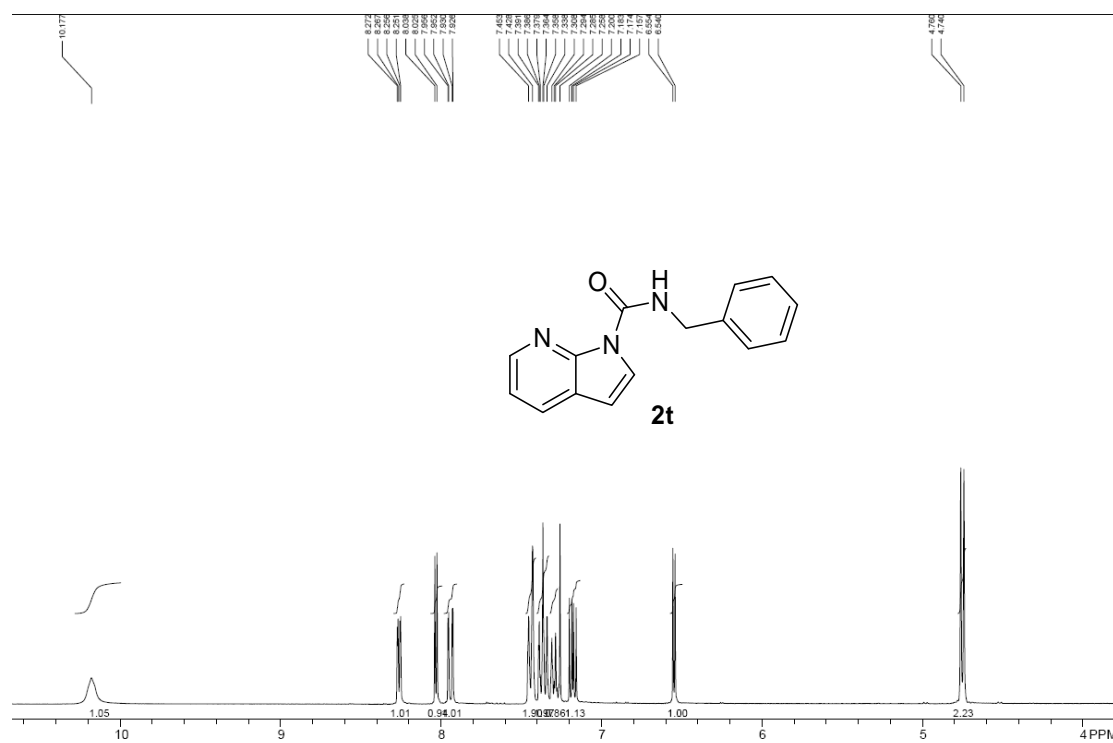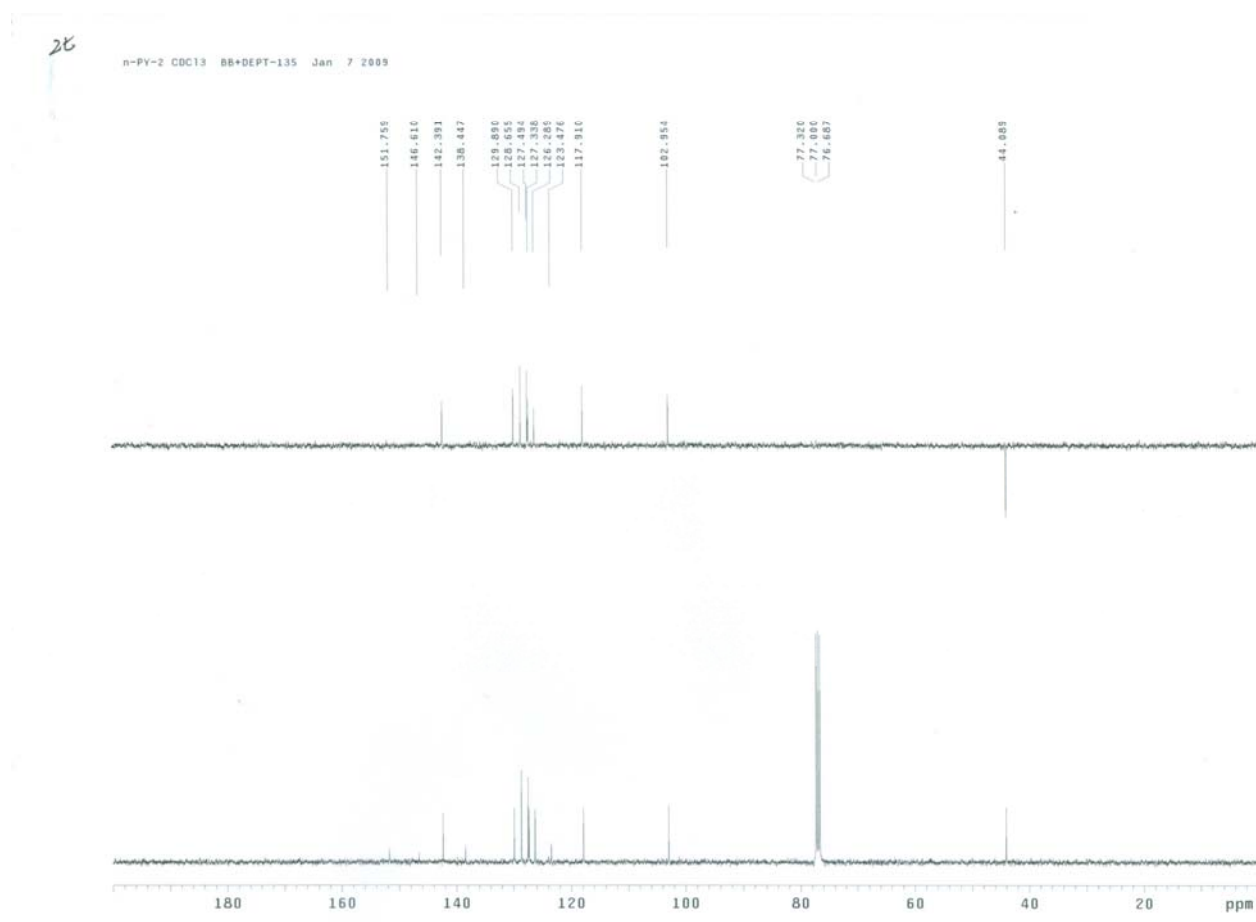

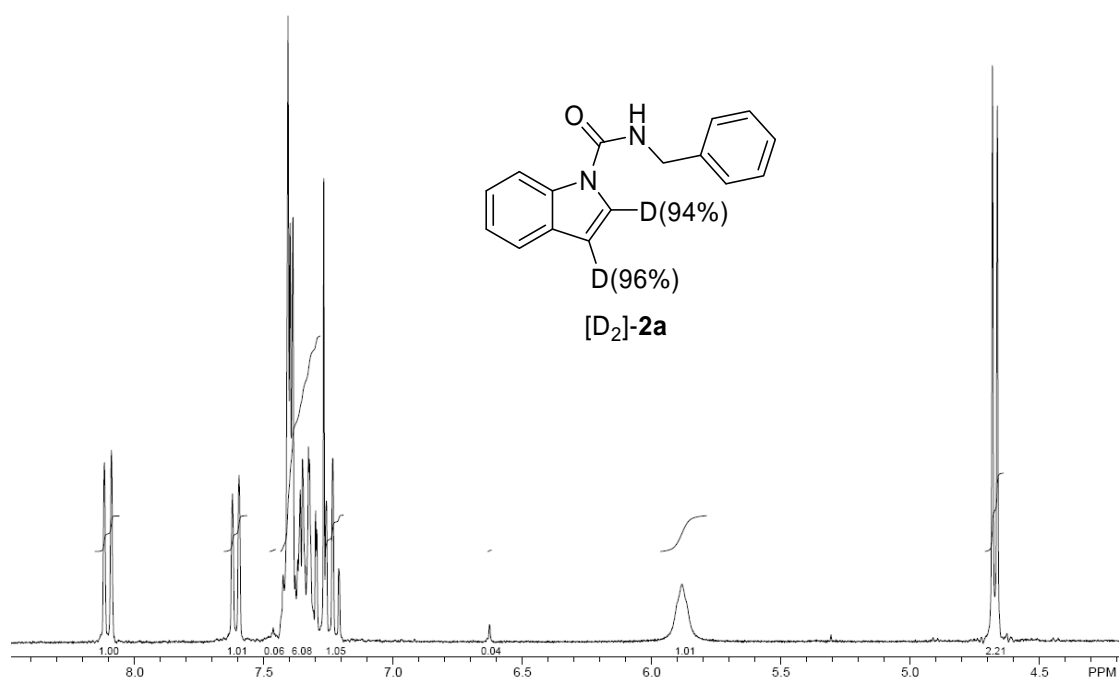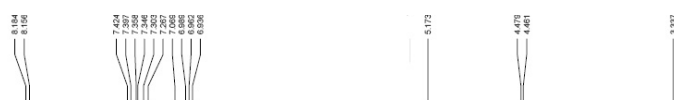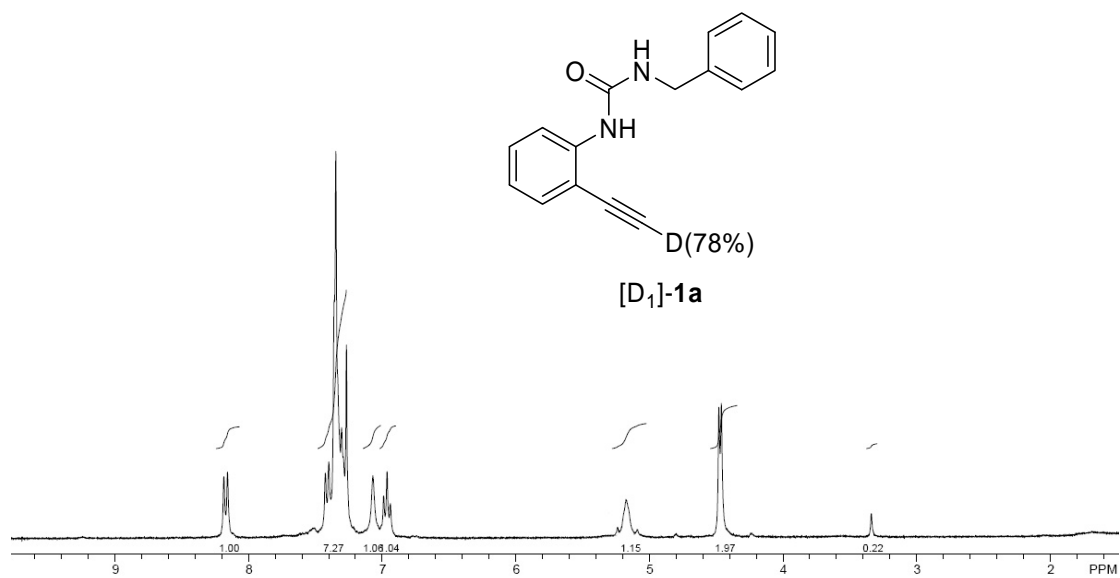

Supplement: b904044g.pdf [file b904044g.pdf]
